# Supplementary material for: Which nets are the most common? Reticular chemistry and information entropy
Source: Royal Society of Chemistry journal article supplement (doi:10.1039/d3ce01230a), 2024-01-01
Supplement: d3ce01230a1.xlsx [file d3ce01230a1.xlsx]

## Sheet: Лист1
Information-entropy measures of 3D nets
Sorting on IGtotal
Net	Valency	v	e	Genus	IG	IGtotal
pcu/	6-c	1	3	3	0.811	3.245
bcu/	8-c	1	4	4	0.722	3.61
fcu/cubic closest packing	12-c	1	6	6	0.592	4.142
dia/	4-c	2	4	3	0.918	5.51
acs /	6-c	2	6	5	0.811	6.49
hex/	8-c	1	4	4	1.371	6.855
ilc/	8-c	1	4	4	1.371	6.855
bct/	10-c	1	5	5	1.252	7.51
dia-b/sphalerite	4-c	2	4	3	1.252	7.51
nbo/	4-c	3	6	4	0.918	8.265
qtz/	4-c	3	6	4	0.918	8.265
acs-b/	6-c	2	6	5	1.061	8.49
pcu-b/NaCl	6-c	2	6	5	1.061	8.49
bcu-b/CsCl, CuZn, beta brass	8-c	2	8	7	0.922	9.219
cds/	4-c	2	4	3	1.585	9.51
sqp /	5-c	2	5	4	1.379	9.651
srs/ Y* SrSi2 ideal	3-c	4	6	3	0.971	9.71
ild/	12-c	1	6	6	1.449	10.142
hms /	3,5-c	2	4	3	1.792	10.755
reo/	8-c	3	12	10	0.722	10.829
bnn/	5-c	2	5	4	1.557	10.897
lvt/	4-c	4	8	5	0.918	11.02
bcu-x/ 14-conn	14-c	1	7	7	1.406	11.245
ile/	10-c	1	5	5	1.918	11.51
fsc/	4,6-c	2	5	4	1.664	11.651
fse/	4,6-c	2	5	4	1.664	11.651
cao/	4,6-c	2	5	4	1.664	11.651
bsn/beta tin, 6/4/t2 ,vD	6-c	2	6	5	1.5	12
jsm/	6-c	2	6	5	1.5	12
mab/	6-c	2	6	5	1.5	12
msw/	6-c	2	6	5	1.5	12
roa/	6-c	2	6	5	1.5	12
rob/	6-c	2	6	5	1.5	12
sda/	6-c	2	6	5	1.5	12
cap/	6-c	2	6	5	1.5	12
flu/fluorite	4,8-c	3	8	6	1.096	12.054
scu/	4,8-c	3	8	6	1.096	12.054
fnu/ uniform net	5-c	2	5	4	1.842	12.897
crs/dia-e	6-c	4	12	9	0.811	12.98
hxg/	6-c	4	12	9	0.811	12.98
lcy/	6-c	4	12	9	0.811	12.98
alb/	6,12-c	3	12	10	0.906	13.584
ftb/	5-c	2	5	4	1.95	13.651
eca/	8-c	2	8	7	1.371	13.71
tfa/	3,4-c	3	5	3	1.75	14
afw/	4-c	3	6	4	1.585	14.265
qzd/	4-c	3	6	4	1.585	14.265
lvt-b/	4-c	4	8	5	1.252	15.02
pts/	4-c	4	8	5	1.252	15.02
lsz/	8-c	2	8	7	1.522	15.219
ths-z/	3-c	4	6	3	1.522	15.219
ths/ ThSi2 ideal	3-c	4	6	3	1.522	15.219
tsi/	8-c	2	8	7	1.522	15.219
fsf/polar , heterocoord 46	4,6-c	2	5	4	2.236	15.651
fsh/	4,6-c	3	7	5	1.571	15.71
tfz-d/	3,8-c	3	7	5	1.571	15.71
xbs/	4,10-c	2	7	6	1.753	15.774
sxa/	6-c	2	6	5	2	16
sxb/	6-c	2	6	5	2	16
sxd/	6-c	2	6	5	2	16
ftw/Cu3Au	4,12-c	4	12	9	1.014	16.226
shp/	4,12-c	4	12	9	1.014	16.226
lcv/srs-e	4-c	6	12	7	0.918	16.529
mog/	4-c	3	6	4	1.837	16.529
mot/	4-c	3	6	4	1.837	16.529
ose/	7-c	2	7	6	1.837	16.529
sev/ 7/4/o1	7-c	2	7	6	1.837	16.529
sit/	3,6-c	3	6	4	1.837	16.529
sod/	4-c	6	12	7	0.918	16.529
tsx/	3,6-c	3	6	4	1.837	16.529
lcz/	12-c	4	24	21	0.592	16.567
nia/	6-c	4	12	9	1.061	16.98
kwh/	7-c	2	7	6	1.891	17.02
xal/	8,12-c	2	10	9	1.418	17.02
hxg-d /	10-c	2	10	9	1.459	17.51
lon/	4-c	4	8	5	1.459	17.51
fsg/	4,6-c	2	5	4	2.522	17.651
fta/simple tiling , polar	5-c	2	5	4	2.522	17.651
kag/	6-c	3	9	7	1.5	18
qtz-x/	6-c	3	9	7	1.5	18
sma/	6-c	3	9	7	1.5	18
smb/	6-c	3	9	7	1.5	18
smc/	6-c	3	9	7	1.5	18
snz/	6-c	3	9	7	1.5	18
sxc/	6-c	3	9	7	1.5	18
tfc/	3,4-c	3	5	3	2.25	18
ttt/	3,12-c	5	12	8	1.086	18.467
yav/	5,6-c	3	8	6	1.686	18.544
crb/	4-c	4	8	5	1.585	19.02
dmp/	4-c	4	8	5	1.585	19.02
mdf/	4-c	4	8	5	1.585	19.02
neb/	4-c	4	8	5	1.585	19.02
tcb /	4-c	4	8	5	1.585	19.02
unc/	4-c	4	8	5	1.585	19.02
uoc/	4-c	4	8	5	1.585	19.02
bcg/	8-c	2	8	7	1.922	19.219
ecu/	8-c	2	8	7	1.922	19.219
lhb/	8-c	2	8	7	1.922	19.219
ths-b/	3-c	4	6	3	1.922	19.219
5/4/t5	5-c	4	10	7	1.379	19.303
xft/	5-c	4	10	7	1.379	19.303
reo-d/	8,14-c	2	11	10	1.489	19.351
stp/	4,6-c	5	12	8	1.16	19.712
nce/	9-c	2	9	8	1.823	20.054
fit/	5,10-c	3	10	8	1.547	20.106
sea/	6,8-c	3	10	8	1.547	20.106
tcs/	4,5-c	4	9	6	1.547	20.106
xah/	4,5-c	4	9	6	1.547	20.106
hcp/hexagonal closest packing	12-c	2	12	11	1.449	20.283
svk/	7-c	2	7	6	2.281	20.529
seb/	6,8-c	2	7	6	2.281	20.529
stb/	6-c	3	9	7	1.73	20.755
tcd/	10-c	2	10	9	1.73	20.755
8/3/m1	8-c	2	8	7	2.122	21.219
ffa/	4,5-c	3	7	5	2.122	21.219
fsd/	4,6-c	3	7	5	2.122	21.219
mcf-d/	4,5-c	3	7	5	2.122	21.219
pte/	4,6-c	3	7	5	2.122	21.219
gra/	3,5-c	4	8	5	1.792	21.51
lon-b/wurtzite	4-c	4	8	5	1.792	21.51
lcx/	8-c	6	24	19	0.722	21.658
thp/	8-c	6	24	19	0.722	21.658
dia-x/	16-c	2	16	15	1.224	22.039
ast-d/	6,18-c	2	12	11	1.592	22.283
7/3/m1	7-c	2	7	6	2.503	22.529
nbo-b/	4-c	6	12	7	1.252	22.529
pth/qzd-e hexagonal PtS	4-c	6	12	7	1.252	22.529
qtz-b/berlinite	4-c	6	12	7	1.252	22.529
cdz/	4-c	3	6	4	2.503	22.529
bto-z/	3-c	6	9	4	1.522	22.829
bto/B2O3	3-c	6	9	4	1.522	22.829
eta /	3-c	6	9	4	1.522	22.829
etb/	3-c	6	9	4	1.522	22.829
pcu-h/	3-c	6	9	4	1.522	22.829
twt/	3-c	6	9	4	1.522	22.829
cco/	10-c	2	10	9	1.918	23.02
cdl/	4-c	4	8	5	1.918	23.02
cds-b/	4-c	4	8	5	1.918	23.02
gpu/gamma Pu	10-c	2	10	9	1.918	23.02
irl /	4-c	4	8	5	1.918	23.02
mok/	4-c	4	8	5	1.918	23.02
sra/	4-c	4	8	5	1.918	23.02
ben/benitoite	4,6-c	4	9	6	1.776	23.086
cdh/	4,6-c	4	9	6	1.776	23.086
yav-d/	4,6-c	4	9	6	1.776	23.086
8/3/m2	8-c	2	8	7	2.322	23.219
pts-x/	4,6-c	4	10	7	1.664	23.303
kag-d/	5,8-c	3	9	7	1.959	23.51
6/4/t7	6-c	4	12	9	1.5	24
6/4/t8	6-c	4	12	9	1.5	24
smm/	6-c	3	9	7	2	24
sne/	6-c	4	12	9	1.5	24
sni/	6-c	4	12	9	1.5	24
snk/	6-c	4	12	9	1.5	24
snw/	6-c	4	12	9	1.5	24
moc/	3,4-c	4	7	4	2.187	24.054
nci /	9-c	2	9	8	2.187	24.054
ncj/	9-c	2	9	8	2.187	24.054
tfo/	3,4-c	4	7	4	2.187	24.054
xan/	5,6-c	3	8	6	2.187	24.054
ncd /	9-c	4	18	15	1.096	24.107
sqc/	4,8-c	6	16	11	1.096	24.107
xbp/	4,6,10-c	3	10	8	1.892	24.596
xak/	8-c	3	12	10	1.64	24.603
bor/	3,4-c	7	12	6	1.312	24.936
bcs/	6-c	8	24	17	0.811	25.961
seh/	6,8-c	4	14	11	1.447	26.039
btv/	5,6-c	3	8	6	2.369	26.054
tfz/	3,4-c	5	9	5	1.877	26.283
tff/	3,4,5-c	3	6	4	2.948	26.529
sld-z/	4,5-c	4	9	6	2.046	26.596
bbe/	4-c	4	8	5	2.252	27.02
chb/CrB	10-c	2	10	9	2.252	27.02
msp/	4-c	4	8	5	2.252	27.02
thj/	4-c	4	8	5	2.252	27.02
lfm/	4-c	4	8	5	2.252	27.02
omy/MnGe4S10	4-c	5	10	6	1.806	27.094
mgc/MgCu2	6,12-c	6	24	19	0.906	27.168
5/4/o10	5-c	4	10	7	1.95	27.303
5/4/o11	5-c	4	10	7	1.95	27.303
est/	5-c	4	10	7	1.95	27.303
fee/4,8^2 prisms,uniform tiling	5-c	4	10	7	1.95	27.303
fni/	5-c	4	10	7	1.95	27.303
fob/	5-c	4	10	7	1.95	27.303
ghw/	5-c	4	10	7	1.95	27.303
loh/	5-c	4	10	7	1.95	27.303
nov /	5-c	4	10	7	1.95	27.303
noy/	5-c	4	10	7	1.95	27.303
noz/	5-c	4	10	7	1.95	27.303
skc/	5-c	4	10	7	1.95	27.303
vbf/	5-c	4	10	7	1.95	27.303
xfv-z/	5-c	4	10	7	1.95	27.303
xfx/	5-c	4	10	7	1.95	27.303
yfx/	5-c	4	10	7	1.95	27.303
zga/ 5/4/o5	5-c	4	10	7	1.95	27.303
xbj/	5-c	4	10	7	1.95	27.303
srs-b /	3-c	8	12	5	1.371	27.419
crs-d/	4,8-c	4	12	9	1.75	28
dmd/	3,4-c	6	10	5	1.75	28
lim/	3,4-c	6	10	5	1.75	28
snp/	6-c	4	12	9	1.75	28
tfi/	3,4-c	6	10	5	1.75	28
tfk/	3,4-c	6	10	5	1.75	28
twf/	4,24-c	7	24	18	0.904	28.031
dmf/	3,4-c	5	8	4	2.162	28.106
npo/	4-c	6	12	7	1.585	28.529
ung/	4-c	6	12	7	1.585	28.529
unh /	4-c	6	12	7	1.585	28.529
uni/	4-c	6	12	7	1.585	28.529
unj/	4-c	6	12	7	1.585	28.529
unn/	4-c	6	12	7	1.585	28.529
unn-z /	4-c	6	12	7	1.585	28.529
uny/	4-c	6	12	7	1.585	28.529
uog/	4-c	6	12	7	1.585	28.529
uon/	4-c	6	12	7	1.585	28.529
uoo/	4-c	6	12	7	1.585	28.529
usf/	4-c	6	12	7	1.585	28.529
fsx/	5,6-c	4	11	8	1.907	28.603
ecn/polar	8-c	3	12	10	1.922	28.829
cab/	5-c	6	15	10	1.379	28.954
fnb/	5-c	6	15	10	1.379	28.954
nbo-x/	12-c	3	18	16	1.379	28.954
mcd/	3,5-c	4	8	5	2.418	29.02
mcf/	3,5-c	4	8	5	2.418	29.02
ssb/	4-c	8	16	9	1.252	30.039
3/8/t6	3-c	8	12	5	1.522	30.439
dia-f/	3-c	8	12	5	1.522	30.439
lig/ LiGe	3-c	8	12	5	1.522	30.439
ocu/	6,8-c	7	24	18	0.993	30.786
btu/	6-c	3	9	7	2.585	31.02
5/4/o9	5-c	4	10	7	2.236	31.303
bcl/polar 3,7-connected	3,7-c	4	10	7	2.236	31.303
skb/	5-c	4	10	7	2.236	31.303
vma/	5-c	4	10	7	2.236	31.303
vmb/	5-c	4	10	7	2.236	31.303
vmc/	5-c	4	10	7	2.236	31.303
xat/	4,6-c	6	14	9	1.571	31.419
xbr/	6,10-c	4	16	13	1.571	31.419
fsj/	4,6-c	6	14	9	1.571	31.419
ncb/	9-c	4	18	15	1.435	31.578
bel/	4-c	5	10	6	2.106	31.584
hea/heazlewoodite , Ni3S2	4,6-c	5	12	8	1.865	31.712
snm/	6-c	4	12	9	2	32
snq/	6-c	4	12	9	2	32
wky/	6-c	4	12	9	2	32
nch/	9-c	2	9	8	2.914	32.054
elc/	11-c	2	11	10	2.47	32.106
rht/	3,24-c	9	24	16	0.983	32.426
ith/	4,12-c	8	24	17	1.014	32.451
edi/edingtonite, ice VI	4-c	5	10	6	2.174	32.603
frl/Ferey ladder	4-c	5	10	6	2.174	32.603
nab/nabesite	4-c	5	10	6	2.174	32.603
mou/	4-c	5	10	6	2.174	32.603
ant/anatase	3,6-c	6	12	7	1.837	33.059
baa /	4-c	6	12	7	1.837	33.059
bbf /	4-c	6	12	7	1.837	33.059
cda/	4-c	6	12	7	1.837	33.059
itv/ice XII	4-c	6	12	7	1.837	33.059
lcs/	4-c	12	24	13	0.918	33.059
mot-e/	4-c	6	12	7	1.837	33.059
rhr/	4-c	12	24	13	0.918	33.059
rtl /	3,6-c	6	12	7	1.837	33.059
sva/	7-c	4	14	11	1.837	33.059
svd/	7-c	4	14	11	1.837	33.059
sve/	7-c	4	14	11	1.837	33.059
svf/	7-c	4	14	11	1.837	33.059
svg/	7-c	4	14	11	1.837	33.059
svi/CuAl2	7-c	4	14	11	1.837	33.059
ths-e/GeS2	4-c	6	12	7	1.837	33.059
wfs/	7-c	4	14	11	1.837	33.059
xao/	3,5-c	6	11	6	1.97	33.487
wzz/	4,6,14-c	4	14	11	1.864	33.549
bcs-b/	6-c	8	24	17	1.061	33.961
hxg-b/	6-c	8	24	17	1.061	33.961
hms-e/hnt-e	6-c	4	12	9	2.139	34.226
xai/	4-c	7	14	8	1.641	34.464
4/6/h6	4-c	6	12	7	1.918	34.529
qdl/quartz dual ladders	4-c	6	12	7	1.918	34.529
tcc/	10-c	3	15	13	1.918	34.529
unb/	4-c	6	12	7	1.918	34.529
une/uniform net	4-c	6	12	7	1.918	34.529
unp/	4-c	6	12	7	1.918	34.529
uom/	4-c	6	12	7	1.918	34.529
tna/	3-c	6	9	4	2.322	34.829
ffb/	4,5-c	5	11	7	2.186	34.98
stc/	6-c	4	12	9	2.186	34.98
dia-a/augmented diamond , 4/3/c6 , qsn-074	4-c	8	16	9	1.459	35.02
gsi /	4-c	8	16	9	1.459	35.02
pcb/	4-c	8	16	9	1.459	35.02
ure/	4-c	8	16	9	1.459	35.02
gpu-x/	14-c	2	14	13	2.25	36
osa/	6-c	4	12	9	2.25	36
skd/	6-c	4	12	9	2.25	36
ske/	6-c	4	12	9	2.25	36
smg/	6-c	6	18	13	1.5	36
smi/	6-c	6	18	13	1.5	36
smn/	6-c	6	18	13	1.5	36
snx/	6-c	6	18	13	1.5	36
vbo/	6-c	4	12	9	2.25	36
vby/	6-c	4	12	9	2.25	36
vmd/	6-c	4	12	9	2.25	36
vme/	6-c	4	12	9	2.25	36
vmj/	6-c	4	12	9	2.25	36
tfl/	3,4-c	6	10	5	2.25	36
xbe/	3,4-c	6	10	5	2.25	36
csq/	4,8-c	9	24	16	1.096	36.161
nor/	4-c	5	10	6	2.44	36.603
tfc-e/	4-c	5	10	6	2.44	36.603
bbg/	4-c	6	12	7	2.059	37.059
bbh/	4-c	6	12	7	2.059	37.059
bcm/	4-c	6	12	7	2.059	37.059
mcn/	3,6-c	6	12	7	2.059	37.059
etc/	3-c	8	12	5	1.895	37.909
4/4/t16	4-c	8	16	9	1.585	38.039
4/4/t39	4-c	8	16	9	1.585	38.039
4/4/t49	4-c	8	16	9	1.585	38.039
gis /	4-c	8	16	9	1.585	38.039
nfc/	4-c	8	16	9	1.585	38.039
und/	4-c	8	16	9	1.585	38.039
bcu-f/	3-c	8	12	5	1.922	38.439
cdt/	3-c	8	12	5	1.922	38.439
dia-g/	3-c	8	12	5	1.922	38.439
eci/	8-c	4	16	13	1.922	38.439
eck/	8-c	4	16	13	1.922	38.439
ecl/	8-c	4	16	13	1.922	38.439
ecm/	8-c	4	16	13	1.922	38.439
utg/	3-c	8	12	5	1.922	38.439
utk/uniform net	3-c	8	12	5	1.922	38.439
utp/	3-c	8	12	5	1.922	38.439
utq/	3-c	8	12	5	1.922	38.439
vcs/	8-c	4	16	13	1.922	38.439
wfd/	8-c	4	16	13	1.922	38.439
wff/	8-c	4	16	13	1.922	38.439
5/4/t45	5-c	8	20	13	1.379	38.606
tfj/	3,4-c	7	12	6	2.037	38.711
ifi/	4,6-c	10	24	15	1.16	39.425
she/	4,6-c	10	24	15	1.16	39.425
soc/	4,6-c	10	24	15	1.16	39.425
toc/	4,6-c	10	24	15	1.16	39.425
moa/moganite related	3,4-c	6	10	5	2.5	40
vmf/	6-c	4	12	9	2.5	40
vmg/	6-c	4	12	9	2.5	40
vmh/	6-c	4	12	9	2.5	40
vmi/	6-c	4	12	9	2.5	40
vmk/	6-c	4	12	9	2.5	40
vtx/	4,6-c	6	16	11	1.823	40.107
ela/11/3/t1, rutile	11-c	4	22	19	1.547	40.211
bbx/	4-c	6	12	7	2.252	40.529
bck/	4-c	6	12	7	2.252	40.529
the/	3,8-c	11	24	14	1.164	40.731
xbo/	6,12-c	5	18	14	1.772	40.758
5/3/h21	5-c	6	15	10	1.95	40.954
5/4/h9	5-c	6	15	10	1.95	40.954
fnc/	5-c	6	15	10	1.95	40.954
fnd/	5-c	6	15	10	1.95	40.954
fne/	5-c	6	15	10	1.95	40.954
fng/	5-c	6	15	10	1.95	40.954
fnh/	5-c	6	15	10	1.95	40.954
fnq/	5-c	6	15	10	1.95	40.954
fns/	5-c	6	15	10	1.95	40.954
fnt/	5-c	6	15	10	1.95	40.954
fnv/chiral , polar	5-c	6	15	10	1.95	40.954
sth/	5-c	6	15	10	1.95	40.954
ttw/stp-e	5-c	6	15	10	1.95	40.954
wlj/	5-c	6	15	10	1.95	40.954
wlk/	5-c	6	15	10	1.95	40.954
wll/	5-c	6	15	10	1.95	40.954
zfz/	5-c	6	15	10	1.95	40.954
7/3/o10	7-c	4	14	11	2.281	41.059
lom/	7-c	4	14	11	2.281	41.059
osf/	7-c	4	14	11	2.281	41.059
ska/	7-c	4	14	11	2.281	41.059
skf/	7-c	4	14	11	2.281	41.059
svh/	7-c	4	14	11	2.281	41.059
swl/ 7/3/o6	7-c	4	14	11	2.281	41.059
vcg/	7-c	4	14	11	2.281	41.059
vck/	7-c	4	14	11	2.281	41.059
vcl/	7-c	4	14	11	2.281	41.059
vcm/	7-c	4	14	11	2.281	41.059
vcn/	7-c	4	14	11	2.281	41.059
vco/	7-c	4	14	11	2.281	41.059
wfy/	7-c	4	14	11	2.281	41.059
vmr/	7-c	4	14	11	2.281	41.059
cml/	3,6-c	6	12	7	2.281	41.059
nbo-x-d/	8-c	5	20	16	1.643	41.077
sta/	6-c	6	18	13	1.73	41.51
tca/	10-c	4	20	17	1.73	41.51
hst/	3,4-c	9	15	7	1.75	42
fab/	5,6-c	7	18	12	1.682	42.057
cds-a /	3-c	8	12	5	2.122	42.439
clh/	3-c	8	12	5	2.122	42.439
nod/	3-c	8	12	5	2.122	42.439
nof/	3-c	8	12	5	2.122	42.439
osb/	8-c	4	16	13	2.122	42.439
rtw/	4,5-c	6	14	9	2.122	42.439
pcb-b/	4-c	8	16	9	1.792	43.02
alb-x/	9,20-c	3	19	17	1.981	43.578
gan/	5-c	8	20	13	1.557	43.586
gan-z/fnm	5-c	8	20	13	1.557	43.586
cys/	3,6-c	12	24	13	1.224	44.078
pyr/pyrite	3,6-c	12	24	13	1.224	44.078
spn/	3,6-c	12	24	13	1.224	44.078
svn/	7-c	8	28	21	1.224	44.078
tsq/	4,8-c	6	16	11	2.005	44.107
urj/	4,8-c	6	16	11	2.005	44.107
sss/	6-c	6	18	13	1.865	44.755
bod/	3-c	10	15	6	1.792	44.812
pha/pharmacosiderite	4,6-c	7	18	12	1.792	44.812
bbi/	4-c	6	12	7	2.503	45.059
bbj/ polar	4-c	6	12	7	2.503	45.059
bbm/	4-c	6	12	7	2.503	45.059
bcn/polar	4-c	6	12	7	2.503	45.059
bcp/	4-c	6	12	7	2.503	45.059
bcq/	4-c	6	12	7	2.503	45.059
bik/bikitaite	4-c	6	12	7	2.503	45.059
jbw/NaJ	4-c	6	12	7	2.503	45.059
lcs-b/	4-c	12	24	13	1.252	45.059
lcw-x/	10-c	6	30	25	1.252	45.059
noq/	4-c	6	12	7	2.503	45.059
sod-b/	4-c	12	24	13	1.252	45.059
ssa/	4-c	12	24	13	1.252	45.059
ssc/	4-c	12	24	13	1.252	45.059
vml/	7-c	4	14	11	2.503	45.059
vmm/	7-c	4	14	11	2.503	45.059
vmn/	7-c	4	14	11	2.503	45.059
vmq/	7-c	4	14	11	2.503	45.059
cdm/	4-c	6	12	7	2.503	45.059
xbt/	4,8-c	6	20	15	1.738	45.192
dme/	3,4-c	6	11	6	2.676	45.487
3/12/c1	3-c	12	18	7	1.522	45.658
bmn/	3-c	12	18	7	1.522	45.658
nbo-a/	3-c	12	18	7	1.522	45.658
sgn/	3-c	12	18	7	1.522	45.658
sgn-z/	3-c	12	18	7	1.522	45.658
srs-a/	3-c	12	18	7	1.522	45.658
utb/	3-c	12	18	7	1.522	45.658
utb-z /	3-c	12	18	7	1.522	45.658
4/4/t15	4-c	8	16	9	1.918	46.039
4/4/t35	4-c	8	16	9	1.918	46.039
4/4/t36	4-c	8	16	9	1.918	46.039
4/4/t37	4-c	8	16	9	1.918	46.039
4/4/t43	4-c	8	16	9	1.918	46.039
4/4/t44	4-c	8	16	9	1.918	46.039
4/5/t1	4-c	8	16	9	1.918	46.039
4/5/t2	4-c	8	16	9	1.918	46.039
4/6/t7	4-c	8	16	9	1.918	46.039
atn/	4-c	8	16	9	1.918	46.039
crb-b/beta BeO	4-c	8	16	9	1.918	46.039
dft/DAF-2 , 4/4/t4 , qsn-086 quasisimple tiling	4-c	8	16	9	1.918	46.039
mmt /	4-c	8	16	9	1.918	46.039
mon/montesommaite	4-c	8	16	9	1.918	46.039
tzs/TlZn2Sb2	4-c	8	16	9	1.918	46.039
ukg/	4-c	8	16	9	1.918	46.039
uki/	4-c	8	16	9	1.918	46.039
ukk/	4-c	8	16	9	1.918	46.039
ukl/	4-c	8	16	9	1.918	46.039
umx/	4-c	8	16	9	1.918	46.039
unm/	4-c	8	16	9	1.918	46.039
uoj/	4-c	8	16	9	1.918	46.039
uot/	4-c	8	16	9	1.918	46.039
uov/	4-c	8	16	9	1.918	46.039
uoz/	4-c	8	16	9	1.918	46.039
upa/	4-c	8	16	9	1.918	46.039
upb/	4-c	8	16	9	1.918	46.039
fit-e/	7,8-c	5	18	14	2.002	46.042
cat/	4,6-c	8	18	11	1.776	46.172
fsb/	4,6-c	8	18	11	1.776	46.172
gfy/	3,9-c	8	18	11	1.776	46.172
pto-d/	4,6-c	8	18	11	1.776	46.172
xmz/	3,9-c	8	18	11	1.776	46.172
jsa/	4-c	8	16	9	1.928	46.265
ecv/	8-c	4	16	13	2.322	46.439
noj/	3-c	8	12	5	2.322	46.439
5/4/h8	5-c	6	15	10	2.236	46.954
wla/	5-c	6	15	10	2.236	46.954
wlb/	5-c	6	15	10	2.236	46.954
wli/	5-c	6	15	10	2.236	46.954
rgd/	12-c	3	18	16	2.236	46.954
cfc/carbon 4C	4-c	8	16	9	1.959	47.02
xbd/	3,5-c	8	14	7	2.163	47.578
6/3/h23	6-c	6	18	13	2	48
6/3/h24	6-c	6	18	13	2	48
6/3/h46	6-c	6	18	13	2	48
6/4/t11	6-c	8	24	17	1.5	48
6/4/t5	6-c	8	24	17	1.5	48
cbs/CrB self-dual	5,7-c	4	12	9	3	48
qtz-e/quartz anions	6-c	6	18	13	2	48
smd/	6-c	6	18	13	2	48
sme/	6-c	6	18	13	2	48
smf/	6-c	6	18	13	2	48
smh/	6-c	6	18	13	2	48
smj/	6-c	6	18	13	2	48
smk/	6-c	6	18	13	2	48
sml/	6-c	6	18	13	2	48
sms/	6-c	6	18	13	2	48
smt/	6-c	6	18	13	2	48
smu/	6-c	6	18	13	2	48
sny/	6-c	6	18	13	2	48
tfs/	6-c	6	18	13	2	48
wmc/	6-c	6	18	13	2	48
urk/	4,6-c	7	18	12	1.922	48.057
ins/	3,4-c	8	14	7	2.187	48.107
ncf/	9-c	4	18	15	2.187	48.107
vcx/	9-c	4	18	15	2.187	48.107
jph/	3,4-c	10	16	7	1.854	48.211
ksx/	4-c	7	14	8	2.297	48.239
bbk/	4-c	6	12	7	2.725	49.059
bbl/	4-c	6	12	7	2.725	49.059
bco/	4-c	6	12	7	2.725	49.059
vmo/	7-c	4	14	11	2.725	49.059
vmp/	7-c	4	14	11	2.725	49.059
anh/	3,6-c	9	18	10	1.837	49.588
brl/beryl	4-c	9	18	10	1.837	49.588
bto-e/	4-c	9	18	10	1.837	49.588
etb-e/	4-c	9	18	10	1.837	49.588
oso/eta-e	4-c	9	18	10	1.837	49.588
pcu-h-e /	4-c	9	18	10	1.837	49.588
twt-e/	4-c	9	18	10	1.837	49.588
tcl/hhc	12-c	3	18	16	2.367	49.709
fla/	4,8-c	9	20	12	1.719	49.862
xbm/	4,8-c	9	20	12	1.719	49.862
ctn/	3,4-c	14	24	11	1.312	49.872
pto/Pt3O4	3,4-c	14	24	11	1.312	49.872
tbo/twisted boracite	3,4-c	14	24	11	1.312	49.872
flu-e/uniform tiling	6-c	8	24	17	1.561	49.961
cdl-e/	4-c	8	16	9	2.085	50.039
nou /	4-c	8	16	9	2.085	50.039
ptt/	4-c	8	16	9	2.085	50.039
sbr/	4-c	8	16	9	2.085	50.039
vmu/	8-c	4	16	13	2.522	50.439
vmv/	8-c	4	16	13	2.522	50.439
vmw/	8-c	4	16	13	2.522	50.439
vmz/	8-c	4	16	13	2.522	50.439
fsl/	4,6-c	6	14	9	2.522	50.439
cai/	5,6-c	6	16	11	2.369	52.107
6/3/h9	6-c	6	18	13	2.25	54
6/4/h4	6-c	6	18	13	2.25	54
smr/	6-c	6	18	13	2.25	54
sto/	3,4-c	9	15	7	2.25	54
tcc-x/	14-c	3	21	19	2.25	54
wma/	6-c	6	18	13	2.25	54
wmb/	6-c	6	18	13	2.25	54
wmf/	6-c	6	18	13	2.25	54
wmg/	6-c	6	18	13	2.25	54
wmh/	6-c	6	18	13	2.25	54
wmi/	6-c	6	18	13	2.25	54
4/4/t14	4-c	8	16	9	2.252	54.039
bbr/	4-c	8	16	9	2.252	54.039
bbv/	4-c	8	16	9	2.252	54.039
cag /	4-c	8	16	9	2.252	54.039
feb/FeB	10-c	4	20	17	2.252	54.039
mob/MoB	10-c	4	20	17	2.252	54.039
pcl/	4-c	8	16	9	2.252	54.039
sra-b/	4-c	8	16	9	2.252	54.039
tce/	10-c	4	20	17	2.252	54.039
tcg/	10-c	4	20	17	2.252	54.039
uke/	4-c	8	16	9	2.252	54.039
ukj/	4-c	8	16	9	2.252	54.039
ukm/	4-c	8	16	9	2.252	54.039
umc/	4-c	8	16	9	2.252	54.039
ume/	4-c	8	16	9	2.252	54.039
umf/	4-c	8	16	9	2.252	54.039
umv/	4-c	8	16	9	2.252	54.039
umw/	4-c	8	16	9	2.252	54.039
uob/	4-c	8	16	9	2.252	54.039
uod/	4-c	8	16	9	2.252	54.039
uou/	4-c	8	16	9	2.252	54.039
uoy/	4-c	8	16	9	2.252	54.039
vba/	4-c	8	16	9	2.252	54.039
vbb/	4-c	8	16	9	2.252	54.039
sse/	4-c	8	16	9	2.252	54.039
4/4/o6	4-c	8	16	9	2.252	54.039
ast/octadecasil	4-c	10	20	11	1.806	54.187
dma/	3-c	8	12	5	2.722	54.439
vms/	8-c	4	16	13	2.722	54.439
vmt/	8-c	4	16	13	2.722	54.439
vmx/	8-c	4	16	13	2.722	54.439
vmy/	8-c	4	16	13	2.722	54.439
xaf/	5,6-c	10	27	18	1.472	54.446
xam/	6,12-c	7	30	24	1.472	54.446
5/3/t23	5-c	8	20	13	1.95	54.606
5/3/t24	5-c	8	20	13	1.95	54.606
5/3/t28	5-c	8	20	13	1.95	54.606
5/3/t29	5-c	8	20	13	1.95	54.606
5/3/t7	5-c	8	20	13	1.95	54.606
5/4/t10	5-c	8	20	13	1.95	54.606
5/4/t11	5-c	8	20	13	1.95	54.606
5/4/t21	5-c	8	20	13	1.95	54.606
5/4/t46	5-c	8	20	13	1.95	54.606
5/4/t47	5-c	8	20	13	1.95	54.606
5/4/t48	5-c	8	20	13	1.95	54.606
5/4/t49	5-c	8	20	13	1.95	54.606
5/4/t50	5-c	8	20	13	1.95	54.606
5/4/t51	5-c	8	20	13	1.95	54.606
5/4/t52	5-c	8	20	13	1.95	54.606
5/4/t53	5-c	8	20	13	1.95	54.606
5/4/t55	5-c	8	20	13	1.95	54.606
5/4/t56	5-c	8	20	13	1.95	54.606
5/4/t57	5-c	8	20	13	1.95	54.606
fnj/	5-c	8	20	13	1.95	54.606
fnx/	5-c	8	20	13	1.95	54.606
noo/	5-c	8	20	13	1.95	54.606
rld-z/	5-c	8	20	13	1.95	54.606
wgt/	5-c	8	20	13	1.95	54.606
wgu/	5-c	8	20	13	1.95	54.606
yfh/	5-c	8	20	13	1.95	54.606
yfi/	5-c	8	20	13	1.95	54.606
yfw/	5-c	8	20	13	1.95	54.606
yfy/	5-c	8	20	13	1.95	54.606
yfz/	5-c	8	20	13	1.95	54.606
zfb/	5-c	8	20	13	1.95	54.606
zfd/	5-c	8	20	13	1.95	54.606
zfe/	5-c	8	20	13	1.95	54.606
zft/	5-c	8	20	13	1.95	54.606
zfv/	5-c	8	20	13	1.95	54.606
zfw/	5-c	8	20	13	1.95	54.606
zfx/	5-c	8	20	13	1.95	54.606
zfy/	5-c	8	20	13	1.95	54.606
xay/	4,8-c	7	20	14	2.041	55.098
msq/	6,8-c	7	24	18	1.793	55.58
6/3/t42	6-c	8	24	17	1.75	56
wgv/	6-c	8	24	17	1.75	56
wgw/	6-c	8	24	17	1.75	56
9/3/o3	9-c	4	18	15	2.55	56.107
9/3/o4	9-c	4	18	15	2.55	56.107
dmc/	3,4-c	8	14	7	2.55	56.107
mog-e/	5,6-c	6	16	11	2.55	56.107
ncm/ 9/3/o1	9-c	4	18	15	2.55	56.107
skg/	9-c	4	18	15	2.55	56.107
skh/	9-c	4	18	15	2.55	56.107
vna/	9-c	4	18	15	2.55	56.107
vnf/	9-c	4	18	15	2.55	56.107
nox/	3,4-c	10	16	7	2.162	56.211
pts-f/	3,4-c	10	16	7	2.162	56.211
svi-x/	11-c	4	22	19	2.162	56.211
noe/	3-c	8	12	5	2.822	56.439
lon-e /	6-c	8	24	17	1.764	56.451
tcj/hc	12-c	4	24	21	2.02	56.567
xax/	4,8-c	8	20	13	2.02	56.567
zxc/	3,6-c	10	18	9	2.02	56.567
bal /	4-c	8	16	9	2.365	56.755
4/3/c7	4-c	12	24	13	1.585	57.059
nfa/	4-c	12	24	13	1.585	57.059
uno/	4-c	12	24	13	1.585	57.059
unw/	4-c	12	24	13	1.585	57.059
unx/	4-c	12	24	13	1.585	57.059
3/8/h5	3-c	12	18	7	1.922	57.658
acs-f/	3-c	12	18	7	1.922	57.658
acs-g/	3-c	12	18	7	1.922	57.658
ecb/	8-c	6	24	19	1.922	57.658
ecc/	8-c	6	24	19	1.922	57.658
ecd/	8-c	6	24	19	1.922	57.658
ece/	8-c	6	24	19	1.922	57.658
ecf/	8-c	6	24	19	1.922	57.658
ecg/	8-c	6	24	19	1.922	57.658
ecp/	8-c	6	24	19	1.922	57.658
etd/	3-c	12	18	7	1.922	57.658
etf/	3-c	12	18	7	1.922	57.658
qtz-f/	3-c	12	18	7	1.922	57.658
qtz-g/	3-c	12	18	7	1.922	57.658
qtz-h/	3-c	12	18	7	1.922	57.658
wiw/	3-c	12	18	7	1.922	57.658
wix/	3-c	12	18	7	1.922	57.658
wiy/	3-c	12	18	7	1.922	57.658
wiz/	3-c	12	18	7	1.922	57.658
5/3/c5	5-c	12	30	19	1.379	57.909
5/4/c2	5-c	12	30	19	1.379	57.909
fca/	5-c	12	30	19	1.379	57.909
fnn/	5-c	12	30	19	1.379	57.909
thp-x/	12-c	6	36	31	1.379	57.909
ubt/	5-c	12	30	19	1.379	57.909
xbn/	4,8,12-c	7	24	18	1.872	58.031
cus/BaCu2S2	4-c	8	16	9	2.418	58.039
lib/	6-c	6	18	13	2.418	58.039
tsy/	3,6-c	8	15	8	2.524	58.042
fry/	3,4-c	8	14	7	2.732	60.107
vnb/	9-c	4	18	15	2.732	60.107
vnc/	9-c	4	18	15	2.732	60.107
vnd/	9-c	4	18	15	2.732	60.107
vne/	9-c	4	18	15	2.732	60.107
7/3/h23	7-c	6	21	16	2.281	61.588
7/3/h24	7-c	6	21	16	2.281	61.588
7/4/h1	7-c	6	21	16	2.281	61.588
svj/	7-c	6	21	16	2.281	61.588
swc/CS+circuits as in 7/3/o10	7-c	6	21	16	2.281	61.588
swd/	7-c	6	21	16	2.281	61.588
swe/	7-c	6	21	16	2.281	61.588
wnf/	7-c	6	21	16	2.281	61.588
wng/	7-c	6	21	16	2.281	61.588
wnj/	7-c	6	21	16	2.281	61.588
wnk/	7-c	6	21	16	2.281	61.588
wnm/	7-c	6	21	16	2.281	61.588
wnn/ 7/3/h26	7-c	6	21	16	2.281	61.588
wno/	7-c	6	21	16	2.281	61.588
wnp/	7-c	6	21	16	2.281	61.588
wnq/	7-c	6	21	16	2.281	61.588
tcf/	10-c	4	20	17	2.585	62.039
5/3/o1	5-c	8	20	13	2.236	62.606
5/3/t20	5-c	8	20	13	2.236	62.606
5/3/t27	5-c	8	20	13	2.236	62.606
5/4/o2	5-c	8	20	13	2.236	62.606
5/4/o3	5-c	8	20	13	2.236	62.606
5/4/t20	5-c	8	20	13	2.236	62.606
5/4/t54	5-c	8	20	13	2.236	62.606
5/4/t9	5-c	8	20	13	2.236	62.606
bcu-i /	5-c	8	20	13	2.236	62.606
fnk/	5-c	8	20	13	2.236	62.606
fnl/	5-c	8	20	13	2.236	62.606
pts-e/	5-c	8	20	13	2.236	62.606
vbc/	5-c	8	20	13	2.236	62.606
vbg/	5-c	8	20	13	2.236	62.606
vbh/	5-c	8	20	13	2.236	62.606
vbi/	5-c	8	20	13	2.236	62.606
vbj/	5-c	8	20	13	2.236	62.606
vbk/	5-c	8	20	13	2.236	62.606
wgb/	5-c	8	20	13	2.236	62.606
wgc/	5-c	8	20	13	2.236	62.606
xfu/	5-c	8	20	13	2.236	62.606
xfw/	5-c	8	20	13	2.236	62.606
xfy/	5-c	8	20	13	2.236	62.606
xfz/	5-c	8	20	13	2.236	62.606
yfg/	5-c	8	20	13	2.236	62.606
yfj/	5-c	8	20	13	2.236	62.606
yfk/	5-c	8	20	13	2.236	62.606
yfl/	5-c	8	20	13	2.236	62.606
zfa/	5-c	8	20	13	2.236	62.606
zfc/	5-c	8	20	13	2.236	62.606
zff/	5-c	8	20	13	2.236	62.606
zfq/	5-c	8	20	13	2.236	62.606
zfr/	5-c	8	20	13	2.236	62.606
zfs/	5-c	8	20	13	2.236	62.606
zfu/	5-c	8	20	13	2.236	62.606
5/4/o12	5-c	8	20	13	2.236	62.606
5/4/o13	5-c	8	20	13	2.236	62.606
mco/	3,4-c	9	15	7	2.615	62.755
xac/	4,6-c	12	28	17	1.571	62.838
fsn/	4,6-c	12	28	17	1.571	62.838
xbk/	4,6,12-c	9	24	16	1.907	62.916
bao/	4-c	10	20	11	2.106	63.168
ucn/	4-c	10	20	11	2.106	63.168
cor/corundum, Al2O3	4,6-c	10	24	15	1.865	63.425
ete/	3-c	12	18	7	2.122	63.658
nta/(9,3)a	3-c	12	18	7	2.122	63.658
qzd-a/	3-c	12	18	7	2.122	63.658
6/3/t36	6-c	8	24	17	2	64
crb-e/	6-c	8	24	17	2	64
snl/	6-c	8	24	17	2	64
sno /	6-c	8	24	17	2	64
wha/	6-c	8	24	17	2	64
elb/	11-c	4	22	19	2.47	64.211
xau/	10,12-c	7	36	30	1.506	64.761
asv/	4-c	10	20	11	2.174	65.207
mgg/Mg2Ga5	4-c	10	20	11	2.174	65.207
nat/natrolite	4-c	10	20	11	2.174	65.207
pts-g/	4-c	10	20	11	2.174	65.207
wut/	4-c	10	20	11	2.174	65.207
thf/	3,5-c	14	27	14	1.594	65.356
baf/BaFe2O4	4-c	8	16	9	2.752	66.039
coe/	4-c	8	16	9	2.752	66.039
fel/feldspar	4-c	8	16	9	2.752	66.039
tco/	10-c	4	20	17	2.752	66.039
cdn/	4-c	8	16	9	2.752	66.039
ana/	4-c	24	48	25	0.918	66.117
asf/utd-e	4-c	12	24	13	1.837	66.117
dag/	3,6-c	12	24	13	1.837	66.117
svb/	7-c	8	28	21	1.837	66.117
svc/	7-c	8	28	21	1.837	66.117
wfq/	7-c	8	28	21	1.837	66.117
xfc/	7-c	8	28	21	1.837	66.117
xfd/	7-c	8	28	21	1.837	66.117
xfe/	7-c	8	28	21	1.837	66.117
xaz/	8,12-c	7	36	30	1.57	67.516
bab /	4-c	9	18	10	2.503	67.588
wni/ 7/3/h9	7-c	6	21	16	2.503	67.588
wnr/	7-c	6	21	16	2.503	67.588
xaq/	3,4-c	11	19	9	2.264	67.923
hms-a/	3,4,5-c	8	16	9	2.865	68.755
xad/	4-c	14	28	15	1.641	68.928
4/3/h10	4-c	12	24	13	1.918	69.059
4/3/h6	4-c	12	24	13	1.918	69.059
4/4/c9	4-c	12	24	13	1.918	69.059
4/4/h33	4-c	12	24	13	1.918	69.059
4/4/h35	4-c	12	24	13	1.918	69.059
4/4/h6	4-c	12	24	13	1.918	69.059
4/6/h9	4-c	12	24	13	1.918	69.059
acs-a/	4-c	12	24	13	1.918	69.059
can/cancrinite	4-c	12	24	13	1.918	69.059
elv/OKeeffe?	4-c	12	24	13	1.918	69.059
ict/ice II	4-c	12	24	13	1.918	69.059
nom/	4-c	12	24	13	1.918	69.059
ptr/	4-c	12	24	13	1.918	69.059
ten/	4-c	12	24	13	1.918	69.059
uku/	4-c	12	24	13	1.918	69.059
ukv/	4-c	12	24	13	1.918	69.059
ums/	4-c	12	24	13	1.918	69.059
umy/	4-c	12	24	13	1.918	69.059
unf/	4-c	12	24	13	1.918	69.059
unl/	4-c	12	24	13	1.918	69.059
unr/	4-c	12	24	13	1.918	69.059
uns/	4-c	12	24	13	1.918	69.059
unu/	4-c	12	24	13	1.918	69.059
unv/	4-c	12	24	13	1.918	69.059
uoh/	4-c	12	24	13	1.918	69.059
uol/	4-c	12	24	13	1.918	69.059
yyz/	4-c	12	24	13	1.918	69.059
uni-d/	3-c	12	18	7	2.322	69.658
wkw/	8-c	6	24	19	2.322	69.658
yug/yugawaralite	4-c	8	16	9	2.918	70.039
vbd/	5-c	8	20	13	2.522	70.606
vbe/	5-c	8	20	13	2.522	70.606
vcb/	5-c	8	20	13	2.522	70.606
vcd/	5-c	8	20	13	2.522	70.606
vce/	5-c	8	20	13	2.522	70.606
vdb/	5-c	8	20	13	2.522	70.606
sqp-a/	4,5-c	10	21	12	2.309	71.58
6/3/t13	6-c	8	24	17	2.25	72
6/3/t49	6-c	8	24	17	2.25	72
6/3/t50	6-c	8	24	17	2.25	72
6/3/t52	6-c	8	24	17	2.25	72
6/3/t53	6-c	8	24	17	2.25	72
6/4/t14	6-c	8	24	17	2.25	72
lcy-e/	6-c	12	36	25	1.5	72
osc/	6-c	8	24	17	2.25	72
reo-e /	6-c	12	36	25	1.5	72
smp/	6-c	12	36	25	1.5	72
sod-e/	6-c	12	36	25	1.5	72
vbn/	6-c	8	24	17	2.25	72
vbt/	6-c	8	24	17	2.25	72
vbu/	6-c	8	24	17	2.25	72
vcz/	6-c	8	24	17	2.25	72
wgx/	6-c	8	24	17	2.25	72
wgy/	6-c	8	24	17	2.25	72
whb/	6-c	8	24	17	2.25	72
whc/	6-c	8	24	17	2.25	72
whd/	6-c	8	24	17	2.25	72
whr/	6-c	8	24	17	2.25	72
wht/	6-c	8	24	17	2.25	72
whu/	6-c	8	24	17	2.25	72
whv/	6-c	8	24	17	2.25	72
whw/	6-c	8	24	17	2.25	72
whx/	6-c	8	24	17	2.25	72
why/	6-c	8	24	17	2.25	72
whz/	6-c	8	24	17	2.25	72
wia/	6-c	8	24	17	2.25	72
wib/	6-c	8	24	17	2.25	72
wic-z/	6-c	8	24	17	2.25	72
wid/	6-c	8	24	17	2.25	72
wie/	6-c	8	24	17	2.25	72
wif/	6-c	8	24	17	2.25	72
wig/	6-c	8	24	17	2.25	72
wiu/	6-c	8	24	17	2.25	72
wiv/	6-c	8	24	17	2.25	72
ele/polar 11-conn!	11-c	4	22	19	2.777	72.211
xww/	4,5-c	8	18	11	2.777	72.211
nba/	3,4-c	15	24	10	1.854	72.317
nnd/	3-c	12	18	7	2.44	73.207
nob/	3-c	12	18	7	2.44	73.207
noi/	3-c	12	18	7	2.44	73.207
nva/	3-c	12	18	7	2.44	73.207
nvb/	3-c	12	18	7	2.44	73.207
wei/	4-c	10	20	11	2.44	73.207
zec/	4-c	10	20	11	2.44	73.207
hcd/	7-c	6	21	16	2.725	73.588
bbn/	4-c	12	24	13	2.059	74.117
cdp/CdP2	4-c	12	24	13	2.059	74.117
isq/	4-c	12	24	13	2.059	74.117
lbt/	4-c	12	24	13	2.059	74.117
svo/	7-c	8	28	21	2.059	74.117
oab/	7-c	6	21	16	2.755	74.382
tcm/hhcc	12-c	4	24	21	2.663	74.567
qdl-e/	4-c	12	24	13	2.085	75.059
ith-d/	3,6-c	14	30	17	1.708	75.156
eco/	8-c	6	24	19	2.522	75.658
ecr/	8-c	6	24	19	2.522	75.658
svn-b/FeSi	7-c	8	28	21	2.113	76.078
mbc/	10,12-c	4	22	19	2.931	76.211
xbu/	4,5,6-c	13	30	18	1.785	76.761
3/8/t7	3-c	16	24	9	1.922	76.877
bcu-g /	3-c	16	24	9	1.922	76.877
bcu-h/	3-c	16	24	9	1.922	76.877
ecj/	8-c	8	32	25	1.922	76.877
lvt-a/	3-c	16	24	9	1.922	76.877
utj/	3-c	16	24	9	1.922	76.877
utm/	3-c	16	24	9	1.922	76.877
utn/	3-c	16	24	9	1.922	76.877
uto/	3-c	16	24	9	1.922	76.877
pti/	4-c	10	20	11	2.574	77.207
fjh/	3,4-c	14	24	11	2.037	77.421
xab/	3,6-c	16	30	15	1.685	77.515
bnn-a/	4,5-c	10	23	14	2.354	77.671
gar/garnet net	4,6-c	20	48	29	1.16	78.85
iac /	4,6-c	20	48	29	1.16	78.85
ibd/	4,6-c	20	48	29	1.16	78.85
xar/	5,12-c	13	36	24	1.613	79.043
xbg/	6,8-c	11	36	26	1.686	79.252
kto/	4-c	9	18	10	2.948	79.588
6/3/o3/CS+circuits as in 6/3/t11	6-c	8	24	17	2.5	80
6/4/o1	6-c	8	24	17	2.5	80
6/4/o2	6-c	8	24	17	2.5	80
neb-e/coord were taken from neb a,b,c from neb-e	6-c	8	24	17	2.5	80
vbl/	6-c	8	24	17	2.5	80
vbm/	6-c	8	24	17	2.5	80
vbp/	6-c	8	24	17	2.5	80
vbq/	6-c	8	24	17	2.5	80
vbr/	6-c	8	24	17	2.5	80
vbs/	6-c	8	24	17	2.5	80
vbv/	6-c	8	24	17	2.5	80
vbw/	6-c	8	24	17	2.5	80
vbx/	6-c	8	24	17	2.5	80
vca/	6-c	8	24	17	2.5	80
vcc/	6-c	8	24	17	2.5	80
vcf/	6-c	8	24	17	2.5	80
vda/	6-c	8	24	17	2.5	80
wgz/	6-c	8	24	17	2.5	80
whs/	6-c	8	24	17	2.5	80
6/3/o6	6-c	8	24	17	2.5	80
6/3/o7	6-c	8	24	17	2.5	80
6/3/o8	6-c	8	24	17	2.5	80
6/3/o9	6-c	8	24	17	2.5	80
6/4/o3	6-c	8	24	17	2.5	80
ctn-x/Th3P4 dual	4,5-c	14	32	19	1.751	80.535
4/4/h19	4-c	12	24	13	2.252	81.059
4/4/h27	4-c	12	24	13	2.252	81.059
4/4/h28	4-c	12	24	13	2.252	81.059
4/4/h37	4-c	12	24	13	2.252	81.059
4/4/h39	4-c	12	24	13	2.252	81.059
4/4/h40	4-c	12	24	13	2.252	81.059
4/6/h14	4-c	12	24	13	2.252	81.059
ato/ALPO-31	4-c	12	24	13	2.252	81.059
bba/	4-c	12	24	13	2.252	81.059
bbs/	4-c	12	24	13	2.252	81.059
bbw/	4-c	12	24	13	2.252	81.059
cha/chabazite	4-c	12	24	13	2.252	81.059
qtz-a/	4-c	12	24	13	2.252	81.059
tch/	10-c	6	30	25	2.252	81.059
ukf/	4-c	12	24	13	2.252	81.059
ukh/	4-c	12	24	13	2.252	81.059
ukn/	4-c	12	24	13	2.252	81.059
uma/	4-c	12	24	13	2.252	81.059
umb/	4-c	12	24	13	2.252	81.059
umb-z/	4-c	12	24	13	2.252	81.059
umg/	4-c	12	24	13	2.252	81.059
umj/	4-c	12	24	13	2.252	81.059
uml/	4-c	12	24	13	2.252	81.059
umm/	4-c	12	24	13	2.252	81.059
umn/	4-c	12	24	13	2.252	81.059
umo/	4-c	12	24	13	2.252	81.059
una/	4-c	12	24	13	2.252	81.059
uof/	4-c	12	24	13	2.252	81.059
uop/	4-c	12	24	13	2.252	81.059
uoq/	4-c	12	24	13	2.252	81.059
wje/	4-c	12	24	13	2.252	81.059
wjf/	4-c	12	24	13	2.252	81.059
wjg/	4-c	12	24	13	2.252	81.059
wjh/	4-c	12	24	13	2.252	81.059
wji/	4-c	12	24	13	2.252	81.059
lhh/	3,5-c	12	24	13	2.252	81.059
mot-a/	3-c	12	18	7	2.707	81.207
5/3/c12	5-c	12	30	19	1.95	81.909
5/3/h7	5-c	12	30	19	1.95	81.909
5/4/h18	5-c	12	30	19	1.95	81.909
bor-e /	5-c	12	30	19	1.95	81.909
fcb/	5-c	12	30	19	1.95	81.909
fcb-z/	5-c	12	30	19	1.95	81.909
fnr/	5-c	12	30	19	1.95	81.909
fnw/	5-c	12	30	19	1.95	81.909
fny/	5-c	12	30	19	1.95	81.909
fnz/	5-c	12	30	19	1.95	81.909
foa/	5-c	12	30	19	1.95	81.909
ubt-z/	5-c	12	30	19	1.95	81.909
wjl/	5-c	12	30	19	1.95	81.909
wjs/	5-c	12	30	19	1.95	81.909
wld/	5-c	12	30	19	1.95	81.909
wlh/	5-c	12	30	19	1.95	81.909
7/3/t27	7-c	8	28	21	2.281	82.117
7/3/t31	7-c	8	28	21	2.281	82.117
7/3/t33	7-c	8	28	21	2.281	82.117
7/3/t9	7-c	8	28	21	2.281	82.117
7/4/t1	7-c	8	28	21	2.281	82.117
apo/alpha-PbO2	3,6-c	12	24	13	2.281	82.117
kea/ice III gamma germanium	4-c	12	24	13	2.281	82.117
svp/	7-c	8	28	21	2.281	82.117
svq/	7-c	8	28	21	2.281	82.117
svr/	7-c	8	28	21	2.281	82.117
svs/	7-c	8	28	21	2.281	82.117
vcj/	7-c	8	28	21	2.281	82.117
wft/	7-c	8	28	21	2.281	82.117
wfu/	7-c	8	28	21	2.281	82.117
wfz/	7-c	8	28	21	2.281	82.117
xfb/	7-c	8	28	21	2.281	82.117
xff/	7-c	8	28	21	2.281	82.117
xfg/	7-c	8	28	21	2.281	82.117
xfh/	7-c	8	28	21	2.281	82.117
jxj/	3,6-c	12	24	13	2.281	82.117
fsi/	4,6-c	10	24	15	2.44	82.974
mgc-x/MgCu2, Laves phase	12,16-c	6	40	35	1.805	83.025
snf/	6-c	12	36	25	1.75	84
sng/	6-c	12	36	25	1.75	84
snh/	6-c	12	36	25	1.75	84
sra-e/SrAl2 anion net	6-c	8	24	17	2.625	84
tfb/	3,4-c	18	30	13	1.75	84
xbi/	4,8-c	12	36	25	1.75	84
xbl/	3,4-c	18	30	13	1.75	84
cbn/	4-c	8	16	9	3.502	84.039
xas/	5,6-c	14	36	23	1.682	84.115
ncg/	9-c	6	27	22	2.55	84.161
nck/	9-c	6	27	22	2.55	84.161
ncl/	9-c	6	27	22	2.55	84.161
wfl/	8-c	8	32	25	2.122	84.877
wfm/	8-c	8	32	25	2.122	84.877
etg/	3-c	16	24	9	2.122	84.877
ndh/	4,5-c	12	26	15	2.248	85.421
xbc/	7,8-c	9	32	24	2.088	85.621
hbr/	8-c	9	36	28	1.907	85.81
spl/	4,6-c	14	32	19	1.871	86.045
hcj/	7-c	6	21	16	3.199	86.382
uri/	4,8-c	15	32	18	1.862	87.517
xba/	4,8-c	15	32	18	1.862	87.517
xbv/	4,8-c	15	32	18	1.862	87.517
tcg-x/	14-c	4	28	25	2.75	88
ket/	4-c	8	16	9	3.668	88.039
xae/	4,5-c	15	36	22	1.735	88.461
fqr/	5-c	10	25	16	2.558	89.525
ctn-d/C3N4 dual	3-c	20	30	11	1.792	89.624
tbd/	3-c	20	30	11	1.792	89.624
xaa/	3-c	20	30	11	1.792	89.624
xaw/	4,6-c	14	36	23	1.792	89.624
xbf/	4,6-c	14	36	23	1.792	89.624
xbh/	4,6-c	14	36	23	1.792	89.624
7/3/o4	7-c	8	28	21	2.503	90.117
bbc/	4-c	12	24	13	2.503	90.117
bbu/	4-c	12	24	13	2.503	90.117
cbt/CuB2O4	4-c	12	24	13	2.503	90.117
ftn/	4-c	12	24	13	2.503	90.117
isx/	4-c	12	24	13	2.503	90.117
rhr-b/	4-c	24	48	25	1.252	90.117
sca/scapolite	4-c	12	24	13	2.503	90.117
vch/	7-c	8	28	21	2.503	90.117
vci/	7-c	8	28	21	2.503	90.117
vcp/	7-c	8	28	21	2.503	90.117
vcq/	7-c	8	28	21	2.503	90.117
vcr/	7-c	8	28	21	2.503	90.117
wfr/	7-c	8	28	21	2.503	90.117
xfa/	7-c	8	28	21	2.503	90.117
xfi/	7-c	8	28	21	2.503	90.117
xfj/	7-c	8	28	21	2.503	90.117
xfk/	7-c	8	28	21	2.503	90.117
ssf/	4-c	12	24	13	2.503	90.117
7/3/o14	7-c	8	28	21	2.503	90.117
7/3/o15	7-c	8	28	21	2.503	90.117
3/4/c3	3-c	24	36	13	1.522	91.316
pbp/pcu-f	3-c	24	36	13	1.522	91.316
pbz/	3-c	24	36	13	1.522	91.316
pcu-g/	3-c	24	36	13	1.522	91.316
pyc/	8-c	12	48	37	1.522	91.316
sod-f/	3-c	24	36	13	1.522	91.316
uta/	3-c	24	36	13	1.522	91.316
vab/	3-c	24	36	13	1.522	91.316
4/4/t21	4-c	16	32	17	1.918	92.078
4/4/t22	4-c	16	32	17	1.918	92.078
4/4/t28	4-c	16	32	17	1.918	92.078
4/4/t52	4-c	16	32	17	1.918	92.078
4/4/t53	4-c	16	32	17	1.918	92.078
4/4/t54	4-c	16	32	17	1.918	92.078
4/4/t65	4-c	16	32	17	1.918	92.078
4/4/t66	4-c	16	32	17	1.918	92.078
4/4/t71	4-c	16	32	17	1.918	92.078
uka/	4-c	16	32	17	1.918	92.078
ukb/	4-c	16	32	17	1.918	92.078
ukd/	4-c	16	32	17	1.918	92.078
ukt/	4-c	16	32	17	1.918	92.078
umr/	4-c	16	32	17	1.918	92.078
umz/	4-c	16	32	17	1.918	92.078
uoa/	4-c	16	32	17	1.918	92.078
uoa-z/	4-c	16	32	17	1.918	92.078
uoi/	4-c	16	32	17	1.918	92.078
uow/	4-c	16	32	17	1.918	92.078
uox/	4-c	16	32	17	1.918	92.078
upd/	4-c	16	32	17	1.918	92.078
wfa/	4-c	16	32	17	1.918	92.078
zni/	4-c	16	32	17	1.918	92.078
sln/beta silicon nitride	3,4-c	14	24	11	2.431	92.363
fff/	4-c	16	32	17	1.928	92.529
urh/	4-c	16	32	17	1.928	92.529
iph/	3-c	16	24	9	2.322	92.877
fvl/	4-c	12	24	13	2.585	93.059
tcn/	10-c	6	30	25	2.585	93.059
fsa/	4,6-c	14	30	17	2.128	93.647
5/4/h31	5-c	12	30	19	2.236	93.909
5/4/h32	5-c	12	30	19	2.236	93.909
5/4/h34	5-c	12	30	19	2.236	93.909
5/4/h42	5-c	12	30	19	2.236	93.909
5/4/h6	5-c	12	30	19	2.236	93.909
acs-h /	5-c	12	30	19	2.236	93.909
acs-i/	5-c	12	30	19	2.236	93.909
fna/	5-c	12	30	19	2.236	93.909
fst/4,6,12 prisms	5-c	12	30	19	2.236	93.909
wjo/	5-c	12	30	19	2.236	93.909
wjp/	5-c	12	30	19	2.236	93.909
wjt/	5-c	12	30	19	2.236	93.909
wjx/	5-c	12	30	19	2.236	93.909
wjy/	5-c	12	30	19	2.236	93.909
wjz/	5-c	12	30	19	2.236	93.909
wka/	5-c	12	30	19	2.236	93.909
wkb/	5-c	12	30	19	2.236	93.909
wkc/	5-c	12	30	19	2.236	93.909
wkd/	5-c	12	30	19	2.236	93.909
wke/	5-c	12	30	19	2.236	93.909
wkx/	5-c	12	30	19	2.236	93.909
wlc/	5-c	12	30	19	2.236	93.909
wle/	5-c	12	30	19	2.236	93.909
wlf/	5-c	12	30	19	2.236	93.909
wlg/	5-c	12	30	19	2.236	93.909
wlm/	5-c	12	30	19	2.236	93.909
wln/	5-c	12	30	19	2.236	93.909
wlp/	5-c	12	30	19	2.236	93.909
wlq/	5-c	12	30	19	2.236	93.909
wlr/	5-c	12	30	19	2.236	93.909
wls/	5-c	12	30	19	2.236	93.909
wlt/	5-c	12	30	19	2.236	93.909
wlu/	5-c	12	30	19	2.236	93.909
xaj/	3,8,12-c	16	36	21	1.838	95.59
lcv-e/	6-c	12	36	25	2	96
npo-e/	6-c	12	36	25	2	96
smw/	6-c	12	36	25	2	96
tcf-x/	14-c	4	28	25	3	96
abr/ABR polyhedron	4-c	14	28	15	2.297	96.477
wsx/	4-c	14	28	15	2.297	96.477
mml/	3,4-c	16	26	11	2.297	96.477
fud/	4-c	15	30	16	2.174	97.81
7/3/o2/CS+circuits as in 7/3/t13	7-c	8	28	21	2.725	98.117
fvk/	4-c	12	24	13	2.725	98.117
kga/	4,5,6-c	9	24	16	2.984	98.465
tci/	10-c	6	30	25	2.752	99.059
nbo-a-e/	4-c	18	36	19	1.837	99.176
srs-a-e/	4-c	18	36	19	1.837	99.176
ssd/	4-c	18	36	19	1.837	99.176
tck/hcc	12-c	6	36	31	2.367	99.419
urf/	3,6,12-c	17	36	20	1.877	99.502
dmb/	3-c	16	24	9	2.522	100.877
osd/	8-c	8	32	25	2.522	100.877
vct/	8-c	8	32	25	2.522	100.877
vcu/	8-c	8	32	25	2.522	100.877
vcv/	8-c	8	32	25	2.522	100.877
wfe/	8-c	8	32	25	2.522	100.877
wfi/	8-c	8	32	25	2.522	100.877
wfj/	8-c	8	32	25	2.522	100.877
wfk/	8-c	8	32	25	2.522	100.877
wfn/	8-c	8	32	25	2.522	100.877
wfo/	8-c	8	32	25	2.522	100.877
wfp/	8-c	8	32	25	2.522	100.877
aht/	4-c	12	24	13	2.837	102.117
att/	4-c	12	24	13	2.837	102.117
atv/	4-c	12	24	13	2.837	102.117
byl/beryllonite, type C	4-c	12	24	13	2.837	102.117
hch/	7-c	8	28	21	2.837	102.117
xbb/	4,5,8-c	15	35	21	2.078	103.889
sku/	4,6-c	16	36	21	2.007	104.345
mhg/	6-c	10	30	21	2.622	104.877
afw-a /	4-c	12	24	13	2.918	105.059
tfg/	3,4-c	20	36	17	1.877	105.134
5/4/h26	5-c	12	30	19	2.522	105.909
wjk/	5-c	12	30	19	2.522	105.909
wjm/	5-c	12	30	19	2.522	105.909
wjn/	5-c	12	30	19	2.522	105.909
wjq/	5-c	12	30	19	2.522	105.909
wju/	5-c	12	30	19	2.522	105.909
wjv/	5-c	12	30	19	2.522	105.909
wjw/	5-c	12	30	19	2.522	105.909
xav/	5,6-c	14	39	26	2.005	106.256
xag/	3,4,12-c	19	36	18	1.934	106.387
6/3/c16	6-c	12	36	25	2.25	108
smv/	6-c	12	36	25	2.25	108
wja/	6-c	12	36	25	2.25	108
wjd/	6-c	12	36	25	2.25	108
wkf/	6-c	12	36	25	2.25	108
wkg/	6-c	12	36	25	2.25	108
wkh/	6-c	12	36	25	2.25	108
wki/	6-c	12	36	25	2.25	108
wme/	6-c	12	36	25	2.25	108
wmj/	6-c	12	36	25	2.25	108
wmk/	6-c	12	36	25	2.25	108
wml/	6-c	12	36	25	2.25	108
wmm/	6-c	12	36	25	2.25	108
wmn/	6-c	12	36	25	2.25	108
wmo/	6-c	12	36	25	2.25	108
wmr/	6-c	12	36	25	2.25	108
wms/	6-c	12	36	25	2.25	108
wmu/	6-c	12	36	25	2.25	108
wmv/	6-c	12	36	25	2.25	108
wmw/	6-c	12	36	25	2.25	108
wmx/	6-c	12	36	25	2.25	108
wmy/	6-c	12	36	25	2.25	108
wmz/	6-c	12	36	25	2.25	108
wna/	6-c	12	36	25	2.25	108
wnb/	6-c	12	36	25	2.25	108
wnc/	6-c	12	36	25	2.25	108
wnd/	6-c	12	36	25	2.25	108
4/4/t20	4-c	16	32	17	2.252	108.078
4/4/t30	4-c	16	32	17	2.252	108.078
4/4/t31	4-c	16	32	17	2.252	108.078
4/6/t8	4-c	16	32	17	2.252	108.078
bsv/ isohedral tiling, simple tiling	4-c	16	32	17	2.252	108.078
dei/	4-c	16	32	17	2.252	108.078
dei-z/	4-c	16	32	17	2.252	108.078
mer/	4-c	16	32	17	2.252	108.078
ukc/	4-c	16	32	17	2.252	108.078
umd/	4-c	16	32	17	2.252	108.078
umh/	4-c	16	32	17	2.252	108.078
umq/	4-c	16	32	17	2.252	108.078
umi/	4-c	16	32	17	2.252	108.078
umu/	4-c	16	32	17	2.252	108.078
uoe/	4-c	16	32	17	2.252	108.078
uos/	4-c	16	32	17	2.252	108.078
upc/	4-c	16	32	17	2.252	108.078
eld/	11-c	6	33	28	2.777	108.317
bel-e/	6-c	10	30	21	2.727	109.064
twf-d/	3,4,6-c	19	36	18	1.984	109.142
5/4/t63	5-c	16	40	25	1.95	109.212
5/4/t64	5-c	16	40	25	1.95	109.212
5/4/t65	5-c	16	40	25	1.95	109.212
zfh/	5-c	16	40	25	1.95	109.212
tph/	6,8-c	14	48	35	1.767	109.572
urg/	4,5,8-c	16	40	25	1.958	109.663
noc/	3-c	18	27	10	2.44	109.81
flu-a/augmented fluorite	4-c	16	32	17	2.292	110.039
tfh/	3,4-c	20	34	15	2.041	110.196
bbp/	4-c	18	36	19	2.059	111.176
agw/	3,4,6-c	20	36	17	1.993	111.624
gao/	3,4,6-c	20	36	17	1.993	111.624
vcw/	9-c	8	36	29	2.55	112.215
vcy/	9-c	8	36	29	2.55	112.215
wfb/	9-c	8	36	29	2.55	112.215
wfc/	9-c	8	36	29	2.55	112.215
jsc/	4-c	14	28	15	2.678	112.477
jsd/	4-c	14	28	15	2.678	112.477
jse/	4-c	14	28	15	2.678	112.477
cdl-a/	3-c	16	24	9	2.822	112.877
pcb-e/	6-c	16	48	33	1.764	112.902
bay/	4-c	16	32	17	2.365	113.51
icf/ice IV	4-c	16	32	17	2.365	113.51
icm/	4-c	16	32	17	2.365	113.51
lon-a /	4-c	16	32	17	2.365	113.51
tpd/ KAlGeO4	4-c	16	32	17	2.365	113.51
4/3/c9	4-c	24	48	25	1.585	114.117
4/4/c13	4-c	24	48	25	1.585	114.117
cbo/CaB2O4	4-c	24	48	25	1.585	114.117
hbo/pto-e	4-c	24	48	25	1.585	114.117
rho/	4-c	24	48	25	1.585	114.117
sst/	4-c	24	48	25	1.585	114.117
uks/	4-c	24	48	25	1.585	114.117
ulj/	4-c	24	48	25	1.585	114.117
3/4/c5	3-c	24	36	13	1.922	115.316
lcv-f /	3-c	24	36	13	1.922	115.316
sin/lcv-g	3-c	24	36	13	1.922	115.316
sod-g /	3-c	24	36	13	1.922	115.316
utc/	3-c	24	36	13	1.922	115.316
fno/	5-c	24	60	37	1.379	115.818
bet/beta tungsten	12,14-c	8	54	47	1.872	116.062
sas/	4-c	16	32	17	2.418	116.078
nju/	3,4-c	21	36	16	2.037	116.132
tsl/	9,20-c	6	38	33	2.641	116.215
fsk/	4,6-c	12	28	17	2.922	116.877
fsm/	4,6-c	12	28	17	2.922	116.877
not/	4-c	12	24	13	3.281	118.117
wkk/	6-c	12	36	25	2.5	120
wkl/	6-c	12	36	25	2.5	120
wkm/	6-c	12	36	25	2.5	120
wkn/	6-c	12	36	25	2.5	120
wko/	6-c	12	36	25	2.5	120
wkp/	6-c	12	36	25	2.5	120
wkq/	6-c	12	36	25	2.5	120
wmd/	6-c	12	36	25	2.5	120
wmp/	6-c	12	36	25	2.5	120
wmq/	6-c	12	36	25	2.5	120
wmt/	6-c	12	36	25	2.5	120
wne/	6-c	12	36	25	2.5	120
zyg/	3,4-c	22	36	15	2.072	120.175
pts-a/cds-e-a,augmented PtS	3,4-c	16	28	13	2.732	120.215
scu-a/	3,4-c	16	28	13	2.732	120.215
tfd/	3,4-c	16	28	13	2.732	120.215
wal/WAl12	9-c	12	54	43	1.823	120.322
nok/	5-c	12	30	19	2.869	120.477
edi-e/	6-c	10	30	21	3.022	120.877
tfe/	3,4-c	23	36	14	2.072	122.243
nia-e/	7-c	12	42	31	2.281	123.176
swf/	7-c	12	42	31	2.281	123.176
swg/	7-c	12	42	31	2.281	123.176
swh/	7-c	12	42	31	2.281	123.176
swi/	7-c	12	42	31	2.281	123.176
swj/	7-c	12	42	31	2.281	123.176
swk/	7-c	12	42	31	2.281	123.176
wns/	7-c	12	42	31	2.281	123.176
wnt/	7-c	12	42	31	2.281	123.176
wnz/	7-c	12	42	31	2.281	123.176
bcb/simple tiling	4-c	16	32	17	2.585	124.078
cag-b/	4-c	16	32	17	2.585	124.078
crb-a /	4-c	16	32	17	2.585	124.078
5/3/t33	5-c	16	40	25	2.236	125.212
5/3/t38	5-c	16	40	25	2.236	125.212
5/4/t22	5-c	16	40	25	2.236	125.212
5/4/t23	5-c	16	40	25	2.236	125.212
5/4/t24	5-c	16	40	25	2.236	125.212
5/4/t35	5-c	16	40	25	2.236	125.212
5/4/t70	5-c	16	40	25	2.236	125.212
bcu-j /	5-c	16	40	25	2.236	125.212
wga/	5-c	16	40	25	2.236	125.212
wgd/	5-c	16	40	25	2.236	125.212
wge/	5-c	16	40	25	2.236	125.212
wgf/	5-c	16	40	25	2.236	125.212
wgh/	5-c	16	40	25	2.236	125.212
wgi/	5-c	16	40	25	2.236	125.212
wgj/	5-c	16	40	25	2.236	125.212
wgk/	5-c	16	40	25	2.236	125.212
wgl/	5-c	16	40	25	2.236	125.212
wgm/	5-c	16	40	25	2.236	125.212
wgn/	5-c	16	40	25	2.236	125.212
wgo/	5-c	16	40	25	2.236	125.212
wgp/	5-c	16	40	25	2.236	125.212
wgq/	5-c	16	40	25	2.236	125.212
wgr/	5-c	16	40	25	2.236	125.212
wgs/	5-c	16	40	25	2.236	125.212
yfa/	5-c	16	40	25	2.236	125.212
yfb/	5-c	16	40	25	2.236	125.212
yfc/	5-c	16	40	25	2.236	125.212
yfd/	5-c	16	40	25	2.236	125.212
yfe/	5-c	16	40	25	2.236	125.212
yff/	5-c	16	40	25	2.236	125.212
yfm/	5-c	16	40	25	2.236	125.212
yfn/	5-c	16	40	25	2.236	125.212
yfo/	5-c	16	40	25	2.236	125.212
yfp/	5-c	16	40	25	2.236	125.212
yfq/	5-c	16	40	25	2.236	125.212
yfr/	5-c	16	40	25	2.236	125.212
yfs/	5-c	16	40	25	2.236	125.212
yft/	5-c	16	40	25	2.236	125.212
yfu/	5-c	16	40	25	2.236	125.212
yfv/	5-c	16	40	25	2.236	125.212
zfg/	5-c	16	40	25	2.236	125.212
zfi/	5-c	16	40	25	2.236	125.212
zfj/	5-c	16	40	25	2.236	125.212
zfk/	5-c	16	40	25	2.236	125.212
zfl/	5-c	16	40	25	2.236	125.212
zfm/	5-c	16	40	25	2.236	125.212
zfn/	5-c	16	40	25	2.236	125.212
zfo/	5-c	16	40	25	2.236	125.212
zfp/	5-c	16	40	25	2.236	125.212
afy/CoAPO-50	4-c	16	32	17	2.615	125.51
alb-x-d/clathrate, simple tiling	4-c	16	32	17	2.615	125.51
hck/	7-c	8	28	21	3.503	126.117
kts/	4-c	12	24	13	3.585	129.059
xap/	3,4,8-c	21	38	18	2.212	130.508
wkj/	6-c	12	36	25	2.75	132
bnl/banalsite	4-c	16	32	17	2.752	132.078
nol/	4-c	16	32	17	2.752	132.078
ltj/	4-c	16	32	17	2.752	132.078
mgz/	6,12-c	12	48	37	2.214	132.825
bac/	4-c	18	36	19	2.503	135.176
bbb/	4-c	18	36	19	2.503	135.176
bcr/simple tiling, isohedral tiling	4-c	18	36	19	2.503	135.176
bcy/simple tiling, isohedral tiling	4-c	18	36	19	2.503	135.176
wkt/	7-c	12	42	31	2.503	135.176
wku/	7-c	12	42	31	2.503	135.176
wkv/	7-c	12	42	31	2.503	135.176
wnh/	7-c	12	42	31	2.503	135.176
wnu/	7-c	12	42	31	2.503	135.176
wnv/	7-c	12	42	31	2.503	135.176
wnw/	7-c	12	42	31	2.503	135.176
wnx/	7-c	12	42	31	2.503	135.176
wny/	7-c	12	42	31	2.503	135.176
mof/	3,4-c	22	38	17	2.264	135.845
pds/	4-c	16	32	17	2.835	136.078
svn-d/	3,6-c	28	48	21	1.799	136.725
4/3/c18	4-c	24	48	25	1.918	138.117
4/3/c20	4-c	24	48	25	1.918	138.117
4/3/c22	4-c	24	48	25	1.918	138.117
4/3/c24	4-c	24	48	25	1.918	138.117
4/4/c10	4-c	24	48	25	1.918	138.117
4/4/c12	4-c	24	48	25	1.918	138.117
4/4/c16	4-c	24	48	25	1.918	138.117
hal/	4-c	24	48	25	1.918	138.117
lcy-a/	4-c	24	48	25	1.918	138.117
lta/reo-a , pcu-j	4-c	24	48	25	1.918	138.117
sod-a/ augmented sodalite	4-c	24	48	25	1.918	138.117
uko/	4-c	24	48	25	1.918	138.117
ukp/	4-c	24	48	25	1.918	138.117
uky/	4-c	24	48	25	1.918	138.117
uld/	4-c	24	48	25	1.918	138.117
uld-z/	4-c	24	48	25	1.918	138.117
ulf/	4-c	24	48	25	1.918	138.117
ulg/	4-c	24	48	25	1.918	138.117
ulh/	4-c	24	48	25	1.918	138.117
uli/	4-c	24	48	25	1.918	138.117
ull/	4-c	24	48	25	1.918	138.117
ulm/	4-c	24	48	25	1.918	138.117
ecq/	8-c	12	48	37	2.322	139.316
baa-e /	6-c	12	36	25	2.918	140.078
bci/	4-c	16	32	17	2.918	140.078
phi/phillipsite	4-c	16	32	17	2.918	140.078
iss/	4-c	18	36	19	2.614	141.176
cds-f/infinite polyhedron	5-c	16	40	25	2.522	141.212
url/	4,6-c	22	48	27	2.035	142.442
6/3/c13	6-c	24	72	49	1.5	144
6/3/t23	6-c	16	48	33	2.25	144
6/3/t63	6-c	16	48	33	2.25	144
6/3/t64	6-c	16	48	33	2.25	144
6/3/t65	6-c	16	48	33	2.25	144
6/3/t66	6-c	16	48	33	2.25	144
6/3/t67	6-c	16	48	33	2.25	144
6/4/t15	6-c	16	48	33	2.25	144
6/4/t9	6-c	16	48	33	2.25	144
lcs-e/	6-c	24	72	49	1.5	144
smo/	6-c	24	72	49	1.5	144
smq/	6-c	24	72	49	1.5	144
whf/	6-c	16	48	33	2.25	144
whg/	6-c	16	48	33	2.25	144
whi/	6-c	16	48	33	2.25	144
whj/	6-c	16	48	33	2.25	144
whk/	6-c	16	48	33	2.25	144
whl/	6-c	16	48	33	2.25	144
whm/	6-c	16	48	33	2.25	144
whp/	6-c	16	48	33	2.25	144
wij/	6-c	16	48	33	2.25	144
wik/	6-c	16	48	33	2.25	144
wil/	6-c	16	48	33	2.25	144
wim/	6-c	16	48	33	2.25	144
win/	6-c	16	48	33	2.25	144
wio/	6-c	16	48	33	2.25	144
nca/	9-c	12	54	43	2.187	144.322
ncc/	9-c	12	54	43	2.187	144.322
cla-d/	12,15-c	7	48	42	2.639	145.142
bbo/	4-c	20	40	21	2.44	146.413
ntb/(9,3)b	3-c	24	36	13	2.44	146.413
fua/	4-c	18	36	19	2.725	147.176
fvn/	4-c	18	36	19	2.725	147.176
fvr/	4-c	18	36	19	2.725	147.176
lev/	4-c	18	36	19	2.725	147.176
wnl/	7-c	12	42	31	2.725	147.176
apc/	4-c	16	32	17	3.085	148.078
apd/	4-c	16	32	17	3.085	148.078
mog-e-x-z/	6-c	12	36	25	3.085	148.078
beb/	6,7-c	12	39	28	2.911	148.461
pyf/	3,4-c	23	40	18	2.365	148.981
ecs/	8-c	12	48	37	2.522	151.316
ect/	8-c	12	48	37	2.522	151.316
noh/	3-c	32	48	17	1.895	151.637
hyx/	3,4-c	24	40	17	2.375	152
sur-a/	3-c	20	30	11	3.044	152.193
rnc/	3,5-c	16	28	13	3.459	152.215
off/	4-c	18	36	19	2.837	153.176
gis-e /	6-c	16	48	33	2.5	160
whe/	6-c	16	48	33	2.5	160
whh/	6-c	16	48	33	2.5	160
whn/	6-c	16	48	33	2.5	160
who/	6-c	16	48	33	2.5	160
whq/	6-c	16	48	33	2.5	160
wih/	6-c	16	48	33	2.5	160
wii/	6-c	16	48	33	2.5	160
wip/	6-c	16	48	33	2.5	160
wiq/	6-c	16	48	33	2.5	160
wir/	6-c	16	48	33	2.5	160
wis/	6-c	16	48	33	2.5	160
wit/	6-c	16	48	33	2.5	160
scu-f/	4,5-c	16	36	21	3.085	160.423
4/4/h42	4-c	24	48	25	2.252	162.117
4/4/h43	4-c	24	48	25	2.252	162.117
afi/	4-c	24	48	25	2.252	162.117
ftw-a/	3,5-c	24	48	25	2.252	162.117
gme/gmelinite , qsn-001	4-c	24	48	25	2.252	162.117
lcv-a/	4-c	24	48	25	2.252	162.117
umk/	4-c	24	48	25	2.252	162.117
nsp/	8-c	12	48	37	2.722	163.316
5/3/c14	5-c	24	60	37	1.95	163.818
5/3/c16	5-c	24	60	37	1.95	163.818
5/3/c17	5-c	24	60	37	1.95	163.818
bcu-l/infinite polyhedron	5-c	24	60	37	1.95	163.818
crs-a/infinite polyhedron	5-c	24	60	37	1.95	163.818
ctn-e /	5-c	24	60	37	1.95	163.818
fcd/	5-c	24	60	37	1.95	163.818
fcf/	5-c	24	60	37	1.95	163.818
fcg/	5-c	24	60	37	1.95	163.818
fci/	5-c	24	60	37	1.95	163.818
fcj/	5-c	24	60	37	1.95	163.818
fcp/	5-c	24	60	37	1.95	163.818
fcq/	5-c	24	60	37	1.95	163.818
fcr/	5-c	24	60	37	1.95	163.818
fcs/	5-c	24	60	37	1.95	163.818
fnf/infinite polyhedon	5-c	24	60	37	1.95	163.818
fnp/	5-c	24	60	37	1.95	163.818
nbo-g/	5-c	24	60	37	1.95	163.818
nbo-h/	5-c	24	60	37	1.95	163.818
pcu-i/	5-c	24	60	37	1.95	163.818
wfw/	7-c	16	56	41	2.281	164.235
atn-e/	6-c	16	48	33	2.625	168
dft-e/	6-c	16	48	33	2.625	168
mon-e/	6-c	16	48	33	2.625	168
bor-a/	3,4-c	24	42	19	2.55	168.322
ttt-a/	3,4-c	24	42	19	2.55	168.322
coi/	4-c	16	32	17	3.585	172.078
hci/	7-c	12	42	31	3.199	172.764
sct/	7-c	12	42	31	3.199	172.764
rnb/	3,6-c	20	36	17	3.093	173.212
ftv/	4-c	24	48	25	2.418	174.117
los/	4-c	24	48	25	2.418	174.117
ast-e/	6-c	20	60	41	2.195	175.637
dgn/	3-c	32	48	17	2.195	175.637
7/3/t43	7-c	16	56	41	2.503	180.235
7/3/t44	7-c	16	56	41	2.503	180.235
bda/simple tiling	4-c	24	48	25	2.503	180.235
ftc/	4-c	24	48	25	2.503	180.235
wfv/	7-c	16	56	41	2.503	180.235
wfx/	7-c	16	56	41	2.503	180.235
xfl/	7-c	16	56	41	2.503	180.235
xfm/	7-c	16	56	41	2.503	180.235
xfn/	7-c	16	56	41	2.503	180.235
xfo/	7-c	16	56	41	2.503	180.235
xfp/	7-c	16	56	41	2.503	180.235
xfq/	7-c	16	56	41	2.503	180.235
xfr/	7-c	16	56	41	2.503	180.235
xfs/	7-c	16	56	41	2.503	180.235
shp-a/	3,4-c	24	42	19	2.732	180.322
stp-a/	3,4-c	24	42	19	2.732	180.322
bcs-e/	8-c	24	96	73	1.522	182.631
lcs-f/	3-c	48	72	25	1.522	182.631
pbg/bcs-f	3-c	48	72	25	1.522	182.631
lng/	4,6-c	20	48	29	2.689	182.85
bbz/simple tiling	4-c	24	48	25	2.585	186.117
npo-a/	4-c	24	48	25	2.585	186.117
5/3/h19	5-c	24	60	37	2.236	187.818
5/3/h20	5-c	24	60	37	2.236	187.818
5/4/h37	5-c	24	60	37	2.236	187.818
fce/	5-c	24	60	37	2.236	187.818
fch/	5-c	24	60	37	2.236	187.818
fcl/	5-c	24	60	37	2.236	187.818
fcm/	5-c	24	60	37	2.236	187.818
fcn/	5-c	24	60	37	2.236	187.818
fco/	5-c	24	60	37	2.236	187.818
lcy-a-x/	5-c	24	60	37	2.236	187.818
srs-f/	5-c	24	60	37	2.236	187.818
srs-g /	5-c	24	60	37	2.236	187.818
ftp/	4-c	24	48	25	2.614	188.235
6/3/c22	6-c	24	72	49	2	192
bcu-k/soc-e infinite polyhedron	6-c	24	72	49	2	192
dia-j/infinite polyhedron	6-c	24	72	49	2	192
pyr-e/pyrite edge net	6-c	24	72	49	2	192
sxe/	6-c	24	72	49	2	192
sxf/	6-c	24	72	49	2	192
sxg/	6-c	24	72	49	2	192
sxj/	6-c	24	72	49	2	192
pth-a/	3,4-c	24	42	19	2.914	192.322
bai/	4-c	30	60	31	2.174	195.62
fto/	4-c	30	60	31	2.174	195.62
sdt/	4-c	30	60	31	2.174	195.62
aww/AlPO4-22	4-c	24	48	25	2.725	196.235
fur/	4-c	24	48	25	2.725	196.235
fvt/	4-c	24	48	25	2.725	196.235
fvu/	4-c	24	48	25	2.725	196.235
alb-a /	4-c	24	48	25	2.752	198.117
ftl/	4-c	24	48	25	2.752	198.117
pbp-e/pcu-f-e	4-c	36	72	37	1.837	198.352
pbz-e/	4-c	36	72	37	1.837	198.352
svl/	7-c	24	84	61	1.837	198.352
svt/	7-c	24	84	61	1.837	198.352
uta-e/simple tiling	4-c	36	72	37	1.837	198.352
wfg/	8-c	16	64	49	2.522	201.754
wfh/	8-c	16	64	49	2.522	201.754
bbd/	4-c	24	48	25	2.837	204.235
bcd/simple tiling	4-c	24	48	25	2.837	204.235
bce/simple tiling	4-c	24	48	25	2.837	204.235
fte/	4-c	24	48	25	2.837	204.235
ftj/	4-c	24	48	25	2.837	204.235
fun/	4-c	24	48	25	2.837	204.235
fva/	4-c	24	48	25	2.837	204.235
fvw/	4-c	24	48	25	2.837	204.235
cag-e/	6-c	16	48	33	3.25	208
pcl-e/	6-c	16	48	33	3.25	208
fum/	4-c	24	48	25	2.918	210.117
fuu/	4-c	24	48	25	2.918	210.117
wjr/	5-c	24	60	37	2.522	211.818
isr/	4-c	24	48	25	2.948	212.235
alw/	4,6-c	20	48	29	3.146	213.947
mot-e-a/	3,4-c	24	44	21	3.146	213.947
snb/	6-c	24	72	49	2.25	216
snr/	6-c	24	72	49	2.25	216
snv/	6-c	24	72	49	2.25	216
sxh/	6-c	24	72	49	2.25	216
sxi/	6-c	24	72	49	2.25	216
sxk/	6-c	24	72	49	2.25	216
tfj-a/	3,4-c	24	40	17	3.375	216
twf-e/	6-c	24	72	49	2.25	216
nia-a/	4,5-c	24	54	31	2.777	216.634
fit-a/	4,5-c	20	46	27	3.287	216.93
ssb-a/	3-c	32	48	17	2.722	217.754
bbq/	4-c	30	60	31	2.44	219.62
qom/	3,6-c	24	48	25	3.05	219.627
fvb/	4-c	24	48	25	3.085	222.117
fvp/	4-c	24	48	25	3.085	222.117
sat/	4-c	24	48	25	3.085	222.117
bcj/	4-c	32	64	33	2.365	227.02
bcx/simple tiling, isohedral tiling, chiral	4-c	32	64	33	2.365	227.02
dia-a-a /	4-c	32	64	33	2.365	227.02
brk/ brookite	3,6-c	24	48	25	3.17	228.235
gie/	4-c	48	96	49	1.585	228.235
elf/	11-c	12	66	55	2.931	228.634
ofp-a/	3,4-c	24	42	19	3.469	228.93
3/8/c3	3-c	48	72	25	1.922	230.631
bva/	3-c	48	72	25	1.922	230.631
naz/	8-c	24	96	73	1.922	230.631
rhr-a/	3-c	48	72	25	1.922	230.631
sod-h/	3-c	48	72	25	1.922	230.631
xai-a/	3,4-c	28	50	23	3.002	234.144
nog /	4-c	20	40	21	3.907	234.413
nos/	3-c	24	36	13	3.907	234.413
zjz/	3,4-c	38	60	23	2.404	235.595
isl/	4-c	24	48	25	3.281	236.235
isy/	4-c	24	48	25	3.281	236.235
rtl-a/	3,5-c	24	48	25	3.281	236.235
wjb/	6-c	24	72	49	2.5	240
wkr/	6-c	24	72	49	2.5	240
wks/	6-c	24	72	49	2.5	240
iac-d/	3,4-c	44	72	29	2.072	240.35
ntt/	3,4-c	44	72	29	2.072	240.35
ant-a/	3,5-c	24	48	25	3.392	244.235
isc/	4-c	24	48	25	3.392	244.235
ocu-e/	7-c	24	84	61	2.281	246.352
pcu-g-e /	4-c	36	72	37	2.281	246.352
svm/	7-c	24	84	61	2.281	246.352
svu/	7-c	24	84	61	2.281	246.352
svv/	7-c	24	84	61	2.281	246.352
svw/	7-c	24	84	61	2.281	246.352
svx/	7-c	24	84	61	2.281	246.352
svy/	7-c	24	84	61	2.281	246.352
toc-e/	7-c	24	84	61	2.281	246.352
isd/	4-c	24	48	25	3.448	248.235
ism/	4-c	24	48	25	3.448	248.235
isw/	4-c	24	48	25	3.448	248.235
cbd/	4-c	22	44	23	3.772	248.93
bap/simple tiling	4-c	32	64	33	2.615	251.02
can-e/cancrinite anion net	6-c	24	72	49	2.625	252
zeb/	4-c	24	48	25	3.503	252.235
ith-e/	8-c	24	96	73	2.122	254.631
rna-a/	3,5-c	24	48	25	3.559	256.235
sqc-a/	3,4-c	32	56	25	2.914	256.43
mjz/	5-c	24	60	37	3.059	256.955
mtn/	4-c	34	68	35	2.524	257.451
coe-e/	6-c	16	48	33	4.063	260
fel-e/feldspar anion net	6-c	16	48	33	4.063	260
bad/	4-c	36	72	37	2.503	270.352
bas/ simple tiling	4-c	36	72	37	2.503	270.352
bcz/simple tiling, isohedral tiling, chiral	4-c	36	72	37	2.503	270.352
fuv/	4-c	36	72	37	2.503	270.352
fvf/	4-c	36	72	37	2.503	270.352
snv-x/	7-c	24	84	61	2.503	270.352
wjc/	7-c	24	84	61	2.503	270.352
ssd-e/	4-c	36	72	37	2.503	270.352
4/5/c1	4-c	48	96	49	1.918	276.235
4/5/c2	4-c	48	96	49	1.918	276.235
4/5/c3	4-c	48	96	49	1.918	276.235
lcs-a/	4-c	48	96	49	1.918	276.235
ukr/	4-c	48	96	49	1.918	276.235
ukw/	4-c	48	96	49	1.918	276.235
ukx/	4-c	48	96	49	1.918	276.235
ula/	4-c	48	96	49	1.918	276.235
ulk-z/	4-c	48	96	49	1.918	276.235
unt/	4-c	48	96	49	1.918	276.235
ech/	8-c	24	96	73	2.322	278.631
pto-a/augmented Pt3O4	3-c	48	72	25	2.322	278.631
she-a/	3-c	48	72	25	2.322	278.631
ban/	4-c	32	64	33	2.918	280.156
fvd/	4-c	32	64	33	2.918	280.156
fve/	4-c	32	64	33	2.918	280.156
scu-g/	3,5-c	32	64	33	2.918	280.156
scu-h/	4-c	32	64	33	2.918	280.156
khn/	3,5-c	32	64	33	2.918	280.156
fvh/	4-c	36	72	37	2.614	282.352
fvj/	4-c	36	72	37	2.614	282.352
mgz-x/	12,16-c	12	80	69	3.12	287.031
naz-x/NaZn13	9-c	24	108	85	2.187	288.645
viv/	4,5,6-c	29	78	50	2.745	293.671
eab/TMA-E	4-c	36	72	37	2.725	294.352
fvm/	4-c	36	72	37	2.725	294.352
bcf/simple tiling	4-c	32	64	33	3.085	296.156
ftd/	4-c	32	64	33	3.085	296.156
fth/	4-c	32	64	33	3.085	296.156
fti/	4-c	32	64	33	3.085	296.156
ftk/	4-c	32	64	33	3.085	296.156
fuo/	4-c	32	64	33	3.085	296.156
fup/	4-c	32	64	33	3.085	296.156
isk/	4-c	24	48	25	4.17	300.235
isp/	4-c	24	48	25	4.17	300.235
tbo-a/	3-c	48	72	25	2.522	302.631
isi/	4-c	24	48	25	4.225	304.235
bby/simple tiling	4-c	36	72	37	2.837	306.352
bca/simple tiling	4-c	36	72	37	2.837	306.352
eri/erionite	4-c	36	72	37	2.837	306.352
ftg/	4-c	36	72	37	2.837	306.352
fvo/	4-c	36	72	37	2.837	306.352
ltl /	4-c	36	72	37	2.837	306.352
maz/mazzite	4-c	36	72	37	2.837	306.352
vfi/	4-c	36	72	37	2.837	306.352
ato-e/	6-c	24	72	49	3.25	312
gfy-a/	3,4-c	36	60	25	3.25	312
sbr-a/	3,4-c	32	52	21	3.726	312.955
mco-a/	3,4-c	30	51	22	3.866	313.146
kwo/	4-c	24	48	25	4.392	316.235
sgt/	4-c	32	64	33	3.335	320.156
brl-a/	3,4-c	36	66	31	3.146	320.921
fau/ faujasite infinite polyhedron	4-c	48	96	49	2.252	324.235
fuf/	4-c	48	96	49	2.252	324.235
kfi/ bcu-n	4-c	48	96	49	2.252	324.235
nfb/	4-c	48	96	49	2.252	324.235
sst-e/	4-c	48	96	49	2.252	324.235
wse/nbo-i	4-c	48	96	49	2.252	324.235
doh/	4-c	34	68	35	3.2	326.431
ssa-a/	3-c	48	72	25	2.722	326.631
ssc-a/	3-c	48	72	25	2.722	326.631
vvi/	4,6-c	31	84	54	2.846	327.301
5/4/c6	5-c	48	120	73	1.95	327.636
bcs-a/	5-c	48	120	73	1.95	327.636
fct/	5-c	48	120	73	1.95	327.636
fcv/	5-c	48	120	73	1.95	327.636
fcw/	5-c	48	120	73	1.95	327.636
fcw-z/	5-c	48	120	73	1.95	327.636
fcx/	5-c	48	120	73	1.95	327.636
fcy/	5-c	48	120	73	1.95	327.636
fcz/	5-c	48	120	73	1.95	327.636
fdb/	5-c	48	120	73	1.95	327.636
urj-a/	3,4-c	32	60	29	3.567	328.168
cua-d/simple tiling, clathrate	4-c	34	68	35	3.28	334.587
tsq-a/	3,4-c	32	60	29	3.654	336.168
ctn-a/augmented C3N4	3,4-c	48	84	37	2.55	336.645
mgc-a/	3,4-c	48	84	37	2.55	336.645
the-a/	3,4-c	48	84	37	2.55	336.645
thp-e/	9-c	24	108	85	2.55	336.645
zxc-a-a/	3,5-c	36	66	31	3.382	344.921
mep/	4-c	46	92	47	2.509	346.291
baq/simple tiling	4-c	48	96	49	2.418	348.235
cgs/	4-c	32	64	33	3.668	352.156
kea-e/	6-c	24	72	49	3.668	352.156
cor-e/corundum edge	7-c	24	84	61	3.281	354.352
bix/ bixbyite	4,6-c	40	96	57	2.667	362.68
cla/	4-c	41	82	42	2.953	363.244
urk-a/	3,5-c	36	78	43	3.195	364.264
bcw/simple tiling, isohedral tiling	4-c	48	96	49	2.585	372.235
fvs/	4-c	48	96	49	2.585	372.235
pyr-a /	3,5-c	48	96	49	2.585	372.235
rht-a/	3,5-c	48	96	49	2.585	372.235
soc-a/	3,5-c	48	96	49	2.585	372.235
spn-a/	3,5-c	48	96	49	2.585	372.235
edp/	4-c	48	96	49	2.585	372.235
fda/	5-c	48	120	73	2.236	375.636
fdc/	5-c	48	120	73	2.236	375.636
6/3/c30	6-c	48	144	97	2	384
csq-a/	3,4-c	48	84	37	2.914	384.645
rra/	3,4-c	60	96	37	2.47	385.269
cgc/	3,6-c	32	84	53	3.341	387.526
sss-a/	3,4,5-c	36	78	43	3.406	388.264
med/	4-c	40	80	41	3.24	388.827
bcv/simple tiling, isohedral tiling	4-c	60	120	61	2.174	391.24
bae/	4-c	48	96	49	2.752	396.235
bar/simple tiling	4-c	48	96	49	2.752	396.235
bat/simple tiling	4-c	48	96	49	2.752	396.235
fus/	4-c	48	96	49	2.752	396.235
fvg/	4-c	48	96	49	2.752	396.235
fvx/	4-c	48	96	49	2.752	396.235
twf-a/	4-c	48	96	49	2.752	396.235
xmz-a/	3,5,6-c	36	78	43	3.511	400.264
icm-e/	6-c	32	96	65	3.127	400.295
fjh-a/	3-c	48	72	25	3.374	404.827
kgn/	3-c	56	84	29	2.892	404.885
mer-e/	6-c	32	96	65	3.25	416
zra-d/	4-c	40	80	41	3.468	416.141
fvv/	4-c	48	96	49	2.918	420.235
mft/	4-c	48	96	49	2.918	420.235
ana-e/	6-c	48	144	97	2.25	432
nbo-f-z/	6-c	48	144	97	2.25	432
pcu-m /	6-c	48	144	97	2.25	432
sxl/	6-c	48	144	97	2.25	432
sxm/	6-c	48	144	97	2.25	432
sxn/	6-c	48	144	97	2.25	432
sxo/	6-c	48	144	97	2.25	432
sxp/	6-c	48	144	97	2.25	432
sxq/	6-c	48	144	97	2.25	432
ocu-a/	4,5-c	48	108	61	2.777	433.269
toc-a /	4,5-c	48	108	61	2.777	433.269
afx/SAPO-56	4-c	48	96	49	3.085	444.235
bam/simple tiling	4-c	48	96	49	3.085	444.235
ftf/	4-c	48	96	49	3.085	444.235
fvc/	4-c	48	96	49	3.085	444.235
svn-a/	3,4-c	56	100	45	2.848	444.288
ith-a/	4,6-c	48	120	73	2.664	447.636
asf-a/	3,4-c	48	88	41	3.382	459.895
mml-a/	3-c	52	78	27	3.622	470.908
ubt-a/	4,5-c	60	126	67	2.567	477.481
hbo-e/	6-c	48	144	97	2.5	480
rho-e /	6-c	48	144	97	2.5	480
isu/	4-c	48	96	49	3.337	480.469
ptr-a/	3,4-c	48	84	37	3.641	480.645
pbp-l/	3-c	72	108	37	2.707	487.24
pbz-l/	3-c	72	108	37	2.707	487.24
gar-e/garnet edge	7-c	48	168	121	2.281	492.704
pbg-e/bcs-f-e	4-c	72	144	73	2.281	492.704
svz/	7-c	48	168	121	2.281	492.704
swa/	7-c	48	168	121	2.281	492.704
swb/	7-c	48	168	121	2.281	492.704
isa/	4-c	48	96	49	3.448	496.469
umt/	3,6-c	42	90	49	3.774	498.155
lta-e/	6-c	48	144	97	2.625	504
rra/	3,4,5-c	60	120	61	2.84	511.24
thp-a/	5,6-c	48	132	85	2.974	535.24
iac-e/	7-c	48	168	121	2.503	540.704
zea/	4-c	52	104	53	3.491	544.523
ana-f/	3-c	96	144	49	2.322	557.263
gat/	3,4,6-c	80	144	65	2.529	566.496
tbr/	8-c	30	120	91	3.802	570.323
csi/simple tiling, clathrate	4-c	60	120	61	3.174	571.24
urh-a/	3,4-c	64	116	53	3.185	573.279
cbo-e/	6-c	48	144	97	3	576
nzn/ NaZn13	12,24-c	28	180	153	2.781	578.359
baj/simple tiling	4-c	72	144	73	2.725	588.704
bau/simple tiling	4-c	72	144	73	2.725	588.704
baw/simple tiling	4-c	72	144	73	2.725	588.704
fuh/	4-c	72	144	73	2.725	588.704
fuj/	4-c	72	144	73	2.725	588.704
fuy/	4-c	72	144	73	2.725	588.704
fuz/	4-c	72	144	73	2.725	588.704
cor-a/	4,5-c	48	108	61	3.777	589.269
uri-a/	3,4-c	64	116	53	3.318	597.279
isj/	4-c	48	96	49	4.17	600.469
iso/	4-c	48	96	49	4.17	600.469
zyg-a/	3-c	72	108	37	3.374	607.24
ise/	4-c	48	96	49	4.225	608.469
isg/	4-c	48	96	49	4.253	612.469
isn/	4-c	48	96	49	4.253	612.469
bag/ simple tiling	4-c	72	144	73	2.837	612.704
bak/simple tiling	4-c	72	144	73	2.837	612.704
ftr/	4-c	72	144	73	2.837	612.704
fts/	4-c	72	144	73	2.837	612.704
ftt/	4-c	72	144	73	2.837	612.704
ftu/	4-c	72	144	73	2.837	612.704
fub/	4-c	72	144	73	2.837	612.704
fue/	4-c	72	144	73	2.837	612.704
fut/	4-c	72	144	73	2.837	612.704
fvi/	4-c	72	144	73	2.837	612.704
odf-d/	12,17-c	23	153	131	3.488	613.831
tfg-a/	3,4-c	72	132	61	3.029	617.842
afi-e/	6-c	48	144	97	3.25	624
gme-e/	6-c	48	144	97	3.25	624
ocu-d-a/	3,5-c	72	120	49	3.25	624
cds-t/	4-c	56	112	57	3.726	625.909
agw-a/	3,4-c	72	114	43	3.47	645.481
sst-a/	3-c	96	144	49	2.722	653.263
mds/	4-c	56	112	57	3.944	662.655
xbf-a/	3,4-c	72	132	61	3.264	665.842
mjy/	5-c	48	120	73	3.964	665.909
jsb/	4-c	84	168	85	2.678	674.864
pbz-m/	3-c	96	144	49	2.922	701.263
sdt-e/	6-c	60	180	121	3.022	725.263
urf-a/	3,5-c	72	144	73	3.392	732.704
poz/	4-c	64	128	65	3.918	752.313
hyx-a/	3-c	80	120	41	3.844	768.771
fui/	3,4-c	96	168	73	2.914	769.29
bnn-t/	4-c	72	144	73	3.614	780.704
ana-a/	4-c	96	192	97	2.752	792.469
ftx/	4-c	96	192	97	2.752	792.469
mgz-x-d/	4-c	68	136	69	3.906	796.862
bcu-t/	4-c	96	192	97	2.918	840.469
ftm/	4-c	96	192	97	2.918	840.469
ftz/	4-c	96	192	97	2.918	840.469
amn/	12,13,16-c	29	190	162	3.853	843.836
gar-a /	4,5-c	96	216	121	2.777	866.537
bah/simple tiling	4-c	96	192	97	3.085	888.469
bav/simple tiling	4-c	96	192	97	3.085	888.469
bax/simple tiling	4-c	96	192	97	3.085	888.469
ftq/	4-c	96	192	97	3.085	888.469
fty/	4-c	96	192	97	3.085	888.469
fug/	4-c	96	192	97	3.085	888.469
ful/	4-c	96	192	97	3.085	888.469
fuw/	4-c	96	192	97	3.085	888.469
fvq/	4-c	96	192	97	3.085	888.469
rug/	4-c	48	96	49	6.17	888.469
tsc/	4-c	96	192	97	3.085	888.469
rhp/	4-c	96	192	97	3.085	888.469
mtn-e/	6-c	68	204	137	3.284	893.36
sod-a-a /	4-c	96	192	97	3.168	912.469
iac-a/	4,5-c	96	216	121	2.931	914.537
ibd-a/	4,5-c	96	216	121	2.931	914.537
tmd/	4,5-c	72	145	74	4.351	944.257
nbd/	4-c	68	136	69	4.769	972.862
act-a/	3,5-c	120	228	109	3.065	1066.58
pbg-l/	3-c	144	216	73	2.974	1070.48
mur/	4-c	74	148	75	4.863	1079.52
mef/	4,5,6-c	94	240	147	3.288	1098.14
zjz-a/	3-c	120	180	61	3.684	1105.16
hms-t/	4-c	96	192	97	3.918	1128.47
csp/simple tiling , clathrate	4-c	120	240	121	3.174	1142.48
rin/	5,6-c	96	252	157	3.341	1162.58
nas/	13,16-c	40	272	233	3.848	1200.58
ntt-a/	3-c	144	216	73	3.374	1214.48
isf/	4-c	96	192	97	4.309	1240.94
mep-e/	6-c	92	276	185	3.386	1246.08
fau-e/	6-c	96	288	193	3.25	1248
kfi-e/	6-c	96	288	193	3.25	1248
ish/	4-c	96	192	97	4.337	1248.94
msd/	4-c	100	200	101	4.222	1266.67
iac-d-a/	3,4-c	144	240	97	3.375	1296
odj/	4-c	96	192	97	4.628	1333
qom-a/	3,5-c	96	192	97	4.793	1380.47
zra-d-e/	6-c	80	240	161	4.359	1395
odi/	4-c	102	204	103	4.748	1452.76
odk/	4-c	104	208	105	4.747	1481.05
sod-t/	4-c	144	288	145	3.503	1513.41
reo-t/	4-c	144	288	145	3.614	1561.41
odh/	4-c	114	228	115	4.57	1562.85
odg/	4-c	119	238	120	4.511	1610.47
odm/	4-c	114	228	115	4.956	1694.85
fiv/uniform net	4,5-c	146	298	153	3.84	1705.08
odf/	4-c	130	260	131	4.428	1726.76
muh/	4-c	148	296	149	4.89	2171.04
viv-a/	3,4,5-c	156	354	199	4.362	2224.79
odl/	4-c	170	340	171	4.807	2451.81
vvi-a/	3,5-c	168	384	217	4.48	2473.01
mgz-x-d-e/	6-c	136	408	273	4.948	2691.7
sig/	4-c	172	344	173	5.383	2777.79
srs-t/	4-c	240	480	241	3.907	2812.96
cnd/	4-c	204	408	205	5.36	3280.58
nas-d/	4-c	232	464	233	4.913	3419.19
moz/	3,4-c	240	468	229	4.967	3516.91
sod-a-a-a/	4-c	384	768	385	4.856	5593.88
mtn-e-a/	4-c	408	816	409	5.065	6199.05
tei/	4-c	460	920	461	6.108	8428.82
tep/	4-c	920	1840	921	6.143	16953.6
